# Supplementary material for: Seminal plasma amino acid profile in different breeds of chicken: Role of seminal plasma on sperm cryoresistance
Source: PubMed Central journal article supplement (PMC6319765; doi:10.1371/journal.pone.0209910), 2019-01-04
Supplement: pone.0209910.s001.pdf [file pone.0209910.s001.pdf]

S1 Dataset. Amino acids profile in seminal plasma of 12 Spanish rooster breeds.

| Rooster Breed           | Month     | Asp  | Thr  | Ser  | Glu   |
|-------------------------|-----------|------|------|------|-------|
| Birchen Leonesa         | August    | 0,9  | 0,74 | 1,22 | 66,54 |
| Birchen Leonesa         | September | 0,48 | 0,62 | 1,44 | 32,02 |
| Birchen Leonesa         | October   | 0,74 | 1,02 | 1,64 | 52,88 |
| Birchen Leonesa         | November  | 0,4  | 0,8  | 1,3  | 23,92 |
| Black Castellana        | August    | 0,7  | 0,54 | 0,94 | 66,1  |
| Black Castellana        | September | 0,48 | 0,58 | 1,18 | 46,42 |
| Black Castellana        | October   | 0,39 | 0,2  | 0,35 | 29,55 |
| Black-Barred Andaluza   | August    | 0,94 | 0,78 | 1,2  | 94,64 |
| Black-Barred Andaluza   | September | 0,18 | 0,26 | 0,58 | 54,48 |
| Black-Barred Andaluza   | October   | 0,42 | 1,1  | 1,36 | 47,74 |
| Black-Barred Andaluza   | November  | 0,66 | 1,68 | 1,4  | 47,6  |
| Black-Red Andaluza      | August    | 0,82 | 0,64 | 1,4  | 66,54 |
| Black-Red Andaluza      | September | 0,48 | 0,58 | 1,64 | 49,6  |
| Black-Red Andaluza      | October   | 0,4  | 0,58 | 1,3  | 39,14 |
| Black-Red Andaluza      | November  | 0,48 | 0,92 | 1,28 | 43,52 |
| Blue Andaluza           | August    | 0,3  | 0,58 | 1,12 | 28,22 |
| Blue Andaluza           | September | 0,8  | 0,6  | 1,5  | 71,66 |
| Blue Andaluza           | October   | 0,48 | 0,7  | 1,62 | 32,14 |
| Blue Andaluza           | November  | 1,36 | 0,48 | 0,66 | 85,8  |
| Buff Prat               | August    | 0,5  | 0,5  | 1,14 | 55,58 |
| Buff Prat               | September | 0,3  | 0,52 | 1,14 | 42,92 |
| Buff Prat               | October   | 0,3  | 0,23 | 0,4  | 29,15 |
| Buff Prat               | November  | 0,26 | 0,56 | 0,76 | 32,48 |
| Quail Castellana        | August    | 0,28 | 0,42 | 1,04 | 38,66 |
| Quail Castellana        | October   | 0,6  | 0,72 | 1,56 | 49,54 |
| Quail Castellana        | November  | 0,8  | 0,98 | 1,84 | 47,18 |
| Quail Silver Castellana | August    | 0,6  | 0,6  | 1,54 | 41,6  |
| Quail Silver Castellana | September | 0,48 | 0,38 | 1,42 | 44,82 |
| Quail Silver Castellana | October   | 0,62 | 0,68 | 1,68 | 38,26 |
| Quail Silver Castellana | November  | 0,54 | 1,42 | 1,54 | 21,24 |
| Red Villafranquina      | August    | 0,37 | 0,17 | 0,32 | 32,86 |
| Red Villafranquina      | September | 0,56 | 0,6  | 1,26 | 52,08 |
| Red Villafranquina      | October   | 0,27 | 0,18 | 0,32 | 27,39 |
| Red Villafranquina      | November  | 0,5  | 1,08 | 1,28 | 43,76 |
| Red-Barred Vasca        | August    | 0,56 | 0,64 | 1,36 | 41,22 |
| Red-Barred Vasca        | September | 0,44 | 0,56 | 1,48 | 38,32 |
| Red-Barred Vasca        | October   | 0,34 | 0,22 | 0,42 | 27,55 |
| Red-Barred Vasca        | November  | 0,52 | 1,02 | 1,28 | 44,14 |
| White Prat              | August    | 0,36 | 0,44 | 1,18 | 31,92 |
| White Prat              | September | 0,3  | 0,42 | 1,22 | 39,72 |
| White Prat              | October   | 0,42 | 0,62 | 1,42 | 37,38 |
| White Prat              | November  | 0,28 | 0,96 | 1,6  | 21,38 |
| White-Faced Spanish     | August    | 0,6  | 0,82 | 1,38 | 55,4  |
| White-Faced Spanish     | September | 0,5  | 0,8  | 1,36 | 41,52 |
| White-Faced Spanish     | October   | 0,46 | 1    | 1,54 | 48,84 |
| White-Faced Spanish     | November  | 0,94 | 1,5  | 1,44 | 58,9  |

| Gly  | Ala  | Cys  | Val  | Met  | Ile  | Leu  |
|------|------|------|------|------|------|------|
| 1,22 | 1,72 | 0,24 | 1,2  | 0,32 | 0,36 | 0,56 |
| 0,84 | 1,46 | 0,24 | 0,96 | 0,2  | 0,18 | 0,46 |
| 1,08 | 1,68 | 0,3  | 1,02 | 0,3  | 0,24 | 0,56 |
| 0,82 | 1,24 | 0,24 | 0,66 | 0,12 | 0,24 | 0,44 |
| 0,72 | 1,08 | 0,24 | 0,76 | 0,28 | 0,2  | 0,32 |
| 0,74 | 1,24 | 0,26 | 0,9  | 0,24 | 0,16 | 0,38 |
| 0,25 | 0,39 | 0    | 0,45 | 0,08 | 0,04 | 0,12 |
| 1,12 | 1,38 | 0,26 | 0,72 | 0,08 | 0,18 | 0,4  |
| 0,36 | 0,72 | 0,18 | 0,28 | 0,04 | 0,12 | 0,18 |
| 0,84 | 1,28 | 0,24 | 0,96 | 0,3  | 0,4  | 0,5  |
| 1,18 | 1,52 | 0,3  | 0,62 | 0,12 | 0,32 | 0,5  |
| 1,18 | 1,9  | 0,28 | 1,2  | 0,28 | 0,3  | 0,5  |
| 0,96 | 1,84 | 0    | 1,32 | 0,3  | 0,3  | 0,5  |
| 0,88 | 1,54 | 0,22 | 0,9  | 0,22 | 0,2  | 0,44 |
| 1    | 1,64 | 0    | 1,44 | 0,38 | 0,48 | 0,68 |
| 0,84 | 1,4  | 0,24 | 1,12 | 0,28 | 0,28 | 0,46 |
| 1    | 1,58 | 0,24 | 0,84 | 0,12 | 0,22 | 0,5  |
| 0,96 | 1,68 | 0,24 | 0,9  | 0,16 | 0,34 | 0,62 |
| 0,84 | 0,6  | 0,36 | 0,48 | 0    | 0,06 | 0,14 |
| 0,8  | 1,38 | 0    | 1,2  | 0,36 | 0,04 | 0,22 |
| 0,68 | 1,24 | 0    | 0,92 | 0,06 | 0,16 | 0,4  |
| 0,28 | 0,42 | 0    | 0,4  | 0,02 | 0,07 | 0,14 |
| 0,54 | 0,92 | 0    | 1,02 | 0,32 | 0,32 | 0,42 |
| 0,72 | 1    | 0,2  | 0,68 | 0,08 | 0,18 | 0,42 |
| 0,9  | 1,48 | 0,26 | 1,08 | 0,32 | 0,34 | 0,52 |
| 1,22 | 1,62 | 0,32 | 1,42 | 0,34 | 0,58 | 0,88 |
| 1    | 1,36 | 0,32 | 1,26 | 0,3  | 0,34 | 0,56 |
| 0,78 | 1,34 | 0,24 | 1    | 0,32 | 0,32 | 0,46 |
| 0,82 | 1,36 | 0,26 | 1,34 | 0,34 | 0,42 | 0,72 |
| 1,28 | 1,52 | 0,22 | 1,44 | 0,38 | 0,56 | 0,9  |
| 0,33 | 0,33 | 0    | 0,45 | 0,1  | 0,04 | 0,09 |
| 0,98 | 1,26 | 0    | 1,18 | 0,28 | 0,32 | 0,42 |
| 0,3  | 0,33 | 0,11 | 0,31 | 0,1  | 0,05 | 0,11 |
| 1,02 | 1,36 | 0,28 | 1,02 | 0,28 | 0,46 | 0,56 |
| 0,94 | 1,54 | 0,24 | 0,9  | 0,26 | 0,18 | 0,42 |
| 0,84 | 1,54 | 0    | 1,16 | 0,2  | 0,18 | 0,42 |
| 0,31 | 0,43 | 0    | 0,45 | 0,12 | 0,08 | 0,12 |
| 1    | 1,16 | 0    | 1,06 | 0,14 | 0,3  | 0,52 |
| 0,9  | 1,24 | 0,24 | 0,94 | 0,3  | 0,22 | 0,38 |
| 0,76 | 1,4  | 0,28 | 1    | 0,32 | 0,38 | 0,5  |
| 0,96 | 1,2  | 0,26 | 1,02 | 0,36 | 0,36 | 0,54 |
| 1,34 | 1,52 | 0,28 | 1,2  | 0,3  | 0,36 | 0,64 |
| 1,06 | 1,42 | 0,3  | 1,12 | 0,34 | 0,26 | 0,46 |
| 0,96 | 1,52 | 0,28 | 1,06 | 0,3  | 0,3  | 0,46 |
| 1    | 1,7  | 0,3  | 1,12 | 0,38 | 0,4  | 0,6  |
| 1,18 | 1,72 | 0,4  | 0,98 | 0,16 | 0,46 | 0,64 |

| Tyr  | Phe  | His  | Lys  | Arg  | Pro   | Nleu |
|------|------|------|------|------|-------|------|
| 0,26 | 0,38 | 0,42 | 0,2  | 0,5  | 2,204 | 0    |
| 0,26 | 0,34 | 0,4  | 0,22 | 0,62 | 1,186 | 0    |
| 0,34 | 0,38 | 0,4  | 0,38 | 0,62 | 1,048 | 0    |
| 0,24 | 0,3  | 0,28 | 0,2  | 0,44 | 0,994 | 0    |
| 0,12 | 0,28 | 0,24 | 0,2  | 0,34 | 0     | 0    |
| 0,2  | 0,34 | 0,28 | 0,2  | 0,36 | 0     | 0    |
| 0,05 | 0,11 | 0,06 | 0,1  | 0,19 | 0     | 0    |
| 0,2  | 0,32 | 0,26 | 0,2  | 0,38 | 0     | 0    |
| 0,1  | 0,26 | 0,14 | 0,04 | 0,1  | 0     | 0    |
| 0,22 | 0,32 | 0,3  | 0,24 | 0,38 | 0     | 0    |
| 0,3  | 0,38 | 0,34 | 0,42 | 0,42 | 0     | 0    |
| 0,22 | 0,4  | 0,38 | 0,18 | 0,44 | 1,308 | 0    |
| 0,18 | 0,3  | 0,34 | 0,12 | 0,28 | 1,134 | 0    |
| 0,2  | 0,26 | 0,26 | 0,16 | 0,36 | 0     | 0    |
| 0,28 | 0,4  | 0,32 | 0,22 | 0,4  | 1,18  | 0    |
| 0,28 | 0,28 | 0,36 | 0,1  | 0,48 | 1,472 | 0    |
| 0,28 | 0,4  | 0,38 | 0,2  | 0,66 | 0     | 0    |
| 0,42 | 0,3  | 0,46 | 0,3  | 0,82 | 1,194 | 0    |
| 0,06 | 0    | 0,08 | 0,66 | 0,84 | 0     | 0    |
| 0,2  | 0,22 | 0,28 | 0,06 | 0,32 | 0     | 0    |
| 0,16 | 0,22 | 0,3  | 0,18 | 0,26 | 0     | 0    |
| 0,06 | 0,12 | 0,08 | 0,2  | 0,3  | 0     | 0    |
| 0,18 | 0,18 | 0,22 | 0,12 | 0,28 | 0,042 | 0    |
| 0,18 | 0,24 | 0,2  | 0,1  | 0,3  | 0,964 | 0    |
| 0,28 | 0,34 | 0,3  | 0,24 | 0,6  | 0     | 0    |
| 0,36 | 0,44 | 0,3  | 0,36 | 1    | 1,194 | 0    |
| 0,26 | 0,32 | 0,36 | 0,3  | 0,7  | 1,116 | 0    |
| 0,24 | 0,32 | 0,32 | 0,14 | 0,44 | 0     | 0    |
| 0,38 | 0,36 | 0,36 | 0,32 | 0,9  | 1,216 | 0    |
| 0,42 | 0,58 | 0,34 | 0,42 | 0,88 | 2,502 | 0    |
| 0,03 | 0    | 0,07 | 0,06 | 0,11 | 0     | 0    |
| 0,18 | 0,34 | 0,34 | 0,18 | 0,34 | 0     | 0    |
| 0,04 | 0,11 | 0,08 | 0,11 | 0,16 | 0     | 0    |
| 0,26 | 0,36 | 0,36 | 0,48 | 0,44 | 0     | 0    |
| 0,2  | 0,32 | 0,4  | 0,14 | 0,38 | 1,164 | 0    |
| 0,22 | 0,3  | 0,42 | 0,14 | 0,46 | 0     | 0    |
| 0,06 | 0,1  | 0,08 | 0,06 | 0,2  | 0     | 0    |
| 0,22 | 0,36 | 0,32 | 0,2  | 0,44 | 1,328 | 0    |
| 0,22 | 0,24 | 0,32 | 0,26 | 0,56 | 0,912 | 0    |
| 0,26 | 0,3  | 0,34 | 0,26 | 0,4  | 0,98  | 0    |
| 0,3  | 0,3  | 0,34 | 0,28 | 0,7  | 1,048 | 0    |
| 0,28 | 0,44 | 0,34 | 0,38 | 0,76 | 1,598 | 0    |
| 0,22 | 0,3  | 0,42 | 0,2  | 0,56 | 1,276 | 0    |
| 0,24 | 0,38 | 0,38 | 0,2  | 0,5  | 0     | 0    |
| 0,3  | 0,36 | 0,34 | 0,24 | 0,64 | 0     | 0    |
| 0,22 | 0,32 | 0,5  | 0,62 | 0,64 | 0     | 0    |
