# Supplementary material for: Seminal plasma amino acid profile in different breeds of chicken: Role of seminal plasma on sperm cryoresistance
Source: PubMed Central journal article supplement (PMC6319765; doi:10.1371/journal.pone.0209910), 2019-01-04
Supplement: pone.0209910.s002.pdf [file pone.0209910.s002.pdf]

**S2 Dataset. Protein concentrations in seminal plasma of 12 Spanish rooster breeds.**

| Rooster Breed           | Protein Concentration (mg/mL) |         |         |           |         |
|-------------------------|-------------------------------|---------|---------|-----------|---------|
|                         | June                          | July    | August  | September | October |
| Birchen Leonesa         | 3,14785                       | 4,10765 | 3,96345 | 3,3696    | 4,11455 |
| Black Castellana        | 3,70735                       | 3,4175  | 3,1631  | 3,03425   | 3,70765 |
| Black-Barred Andaluza   | 3,4418                        | 3,6946  | 3,2306  | 2,8297    | 3,8298  |
| Black-Red Andaluza      | 4,0689                        | 3,65145 | 4,44285 | 3,62285   | 3,81825 |
| Blue Andaluza           | 3,1684                        | 2,91465 | 3,96115 | 3,41355   | 3,36475 |
| Buff Prat               | 4,0964                        | 4,0631  | 4,4855  | 4,43755   | 5,52995 |
| Quail Castellana        | 5,6238                        | 4,1807  | 3,5832  |           | 4,0581  |
| Quail Silver Castellana | 4,4345                        | 3,7033  | 3,7519  | 3,225     | 3,82175 |
| Red Villafranguina      | 3,8095                        | 3,9543  | 4,23005 | 3,6352    | 3,9814  |
| Red-Barred Vasca        | 3,6125                        | 3,7554  | 3,5991  | 3,7861    | 4,39755 |
| White Prat              | 3,27995                       | 3,16945 | 3,3359  | 3,6643    | 3,7142  |
| White-Faced Spanish     | 3,44055                       | 3,9271  | 3,6419  | 3,4332    | 3,75635 |
