# Supplementary material for: Seminal plasma amino acid profile in different breeds of chicken: Role of seminal plasma on sperm cryoresistance
Source: PubMed Central journal article supplement (PMC6319765; doi:10.1371/journal.pone.0209910), 2019-01-04
Supplement: pone.0209910.s003.pdf [file pone.0209910.s003.pdf]

**S3 Dataset. Viability and concentration of fresh sperm. Sperm viability of frozen sperm with plasma and without plasma of 12 Spanish rooster breeds.**

w/p= with plasma

w/o/p= without plasma

| Rooster Breed      | Date       | Viability (%) |               |            |              | Concentration<br>(10 <sup>6</sup> spz/ml) |
|--------------------|------------|---------------|---------------|------------|--------------|-------------------------------------------|
|                    |            | Fresh         | Centrifugated | Frozen w/p | Frozen w/o/p |                                           |
| Black-Red Andaluza | 6/20/2016  | 86            |               |            |              | 4065,5                                    |
| Black-Red Andaluza | 6/27/2016  | 69            |               | 63         |              | 3887,3                                    |
| Black-Red Andaluza | 7/4/2016   | 83            |               | 34         |              | 4917,6                                    |
| Black-Red Andaluza | 7/13/2016  | 91            |               |            |              | 1137,5                                    |
| Black-Red Andaluza | 7/18/2016  | 88            | 79            | 56         | 51           | 6538,9                                    |
| Black-Red Andaluza | 8/10/2016  | 90            | 79            | 51         | 47           | 2597,6                                    |
| Black-Red Andaluza | 9/7/2016   | 83            | 58            | 68         | 46           | 4269,7                                    |
| Black-Red Andaluza | 9/19/2016  | 75            | 63            | 42         | 40           | 3581,5                                    |
| Black-Red Andaluza | 9/28/2016  | 86            | 68            | 67         | 52           | 1724                                      |
| Black-Red Andaluza | 10/10/2016 | 74            | 79            | 38         | 47           | 3765,6                                    |
| Black-Red Andaluza | 10/17/2016 | 80            | 66            | 31         | 47           | 1748,2                                    |
| Black-Red Andaluza | 10/26/2016 | 82            | 72            | 62         | 30           | 1232,3                                    |
| Black-Red Andaluza | 11/10/2016 | 83            | 74            | 61         | 67           | 564,5                                     |
| Black-Red Andaluza | 11/16/2016 | 90            | 48            | 58         | 44           | 1475,1                                    |
| Birchen Leonesa    | 6/20/2016  | 87            |               |            |              | 1466                                      |
| Birchen Leonesa    | 6/27/2016  | 77            |               | 70         |              | 2069,2                                    |
| Birchen Leonesa    | 7/4/2016   | 85            |               |            |              | 6822                                      |
| Birchen Leonesa    | 7/13/2016  | 81            |               | 84         |              | 4783,2                                    |
| Birchen Leonesa    | 7/18/2016  | 82            | 48            | 66         | 26           | 2185,6                                    |
| Birchen Leonesa    | 9/7/2016   | 78            | 62            | 54         | 61           | 3188,8                                    |
| Birchen Leonesa    | 9/19/2016  | 75            | 57            | 41         | 60           | 3308,3                                    |
| Birchen Leonesa    | 9/21/2016  | 85            | 75            | 56         | 49           | 1353,3                                    |
| Birchen Leonesa    | 10/3/2016  | 80            | 80            | 63         | 44           | 1169,3                                    |
| Birchen Leonesa    | 10/17/2016 | 70            | 38            | 32         | 2            | 1022,8                                    |
| Birchen Leonesa    | 10/26/2016 | 61            | 31            | 39         | 51           | 1387,1                                    |
| Birchen Leonesa    | 11/10/2016 | 86            | 48            | 43         | 45           | 943,9                                     |

|                  |            |    |    |    |    |        |
|------------------|------------|----|----|----|----|--------|
| Birchen Leonesa  | 11/16/2016 | 94 | 47 | 70 | 60 | 1205   |
| Birchen Leonesa  | 11/21/2016 | 89 | 60 | 56 | 45 | 1034,4 |
| Red-Barred Vasca | 6/20/2016  | 86 |    | 80 |    | 2968,1 |
| Red-Barred Vasca | 6/27/2016  | 75 |    | 88 |    | 3600,9 |
| Red-Barred Vasca | 7/4/2016   | 69 |    |    |    | 3726,3 |
| Red-Barred Vasca | 7/13/2016  | 78 |    | 82 | 58 | 6680,3 |
| Red-Barred Vasca | 7/18/2016  | 85 | 61 | 66 | 53 | 2129,6 |
| Red-Barred Vasca | 8/10/2016  | 90 | 76 | 40 | 31 | 7022,6 |
| Red-Barred Vasca | 9/7/2016   | 76 | 63 | 67 | 45 | 5428,2 |
| Red-Barred Vasca | 9/19/2016  | 69 | 54 | 44 | 45 | 3602,7 |
| Red-Barred Vasca | 9/21/2016  | 69 | 0  | 51 | 63 | 2418,5 |
| Red-Barred Vasca | 10/3/2016  | 86 | 74 | 55 | 47 | 4389,1 |
| Red-Barred Vasca | 10/17/2016 | 74 | 62 | 57 | 32 | 516,7  |
| Red-Barred Vasca | 10/26/2016 | 53 | 54 | 33 | 37 | 2148,9 |
| Red-Barred Vasca | 11/7/2016  | 85 | 55 | 59 | 50 | 1599,5 |
| Quail castellana | 6/20/2016  | 88 |    |    |    | 1373,1 |
| Quail castellana | 6/27/2016  | 72 |    | 76 |    | 2051,2 |
| Quail castellana | 7/4/2016   | 64 |    | 68 |    | 2176,6 |
| Quail castellana | 7/13/2016  | 78 |    | 82 |    | 2061,9 |
| Quail castellana | 7/18/2016  | 49 | 73 | 45 | 71 | 2582   |
| Quail castellana | 8/10/2016  | 88 | 81 | 50 | 19 | 1314,2 |
| Quail castellana | 9/7/2016   | 89 | 68 | 70 | 40 | 3350,1 |
| Quail castellana | 9/19/2016  | 88 | 94 | 50 | 50 | 2807,5 |
| Quail castellana | 9/21/2016  | 74 | 69 | 50 | 43 | 1958,9 |
| Quail castellana | 10/3/2016  | 81 | 87 | 58 | 42 | 2923,2 |
| Quail castellana | 10/17/2016 | 71 | 44 | 38 | 17 | 1151,5 |
| Quail castellana | 10/26/2016 | 88 | 67 | 64 | 55 | 1159,4 |
| Quail castellana | 11/10/2016 | 70 | 54 | 75 | 43 | 842,3  |
| Quail castellana | 11/16/2016 | 82 | 79 | 65 | 71 | 1538,8 |
| White Prat       | 6/20/2016  | 82 |    | 78 |    | 2164,6 |
| White Prat       | 6/27/2016  | 78 |    | 79 |    | 2812,6 |
| White Prat       | 7/4/2016   |    |    | 84 |    | 1280,9 |
| White Prat       | 7/13/2016  | 74 |    | 81 |    | 3081,3 |

|                         |            |    |    |     |    |        |
|-------------------------|------------|----|----|-----|----|--------|
| White Prat              | 7/18/2016  | 88 | 57 | 87  | 47 | 3538,3 |
| White Prat              | 8/10/2016  | 76 | 76 | 52  | 54 | 2861,9 |
| White Prat              | 9/7/2016   | 69 | 59 | 63  | 57 | 2364,7 |
| White Prat              | 9/19/2016  | 88 | 52 | 72  | 53 | 726,2  |
| White Prat              | 9/21/2016  | 93 | 67 | 62  | 56 | 1228,1 |
| White Prat              | 10/3/2016  | 89 | 79 | 51  | 54 | 3303,9 |
| White Prat              | 10/17/2016 | 54 | 80 | 41  | 46 | 1438,7 |
| White Prat              | 10/26/2016 | 79 | 85 | 52  | 48 | 692    |
| White Prat              | 11/10/2016 | 78 | 68 | 73  | 58 | 597,9  |
| White Prat              | 11/16/2016 | 88 | 81 | 78  | 66 | 960,6  |
| Blue Andaluza           | 6/20/2016  | 78 |    | 73  |    | 2602,4 |
| Blue Andaluza           | 6/27/2016  | 85 |    | 60  |    | 1899,0 |
| Blue Andaluza           | 7/4/2016   | 68 |    | 64  |    | 2373,7 |
| Blue Andaluza           | 7/13/2016  | 79 |    | 74  |    | 3505,0 |
| Blue Andaluza           | 7/18/2016  | 77 | 84 | 100 | 51 | 483,7  |
| Blue Andaluza           | 8/10/2016  | 74 | 80 | 52  | 52 | 1659,4 |
| Blue Andaluza           | 9/7/2016   | 82 | 67 | 48  | 55 | 2096,0 |
| Blue Andaluza           | 9/19/2016  | 62 | 68 | 51  | 37 | 3620,9 |
| Blue Andaluza           | 9/28/2016  | 87 | 61 | 65  | 65 | 1812,0 |
| Blue Andaluza           | 10/10/2016 | 82 | 81 | 68  | 39 | 2042,6 |
| Blue Andaluza           | 10/17/2016 | 89 | 68 | 47  | 35 | 1208,0 |
| Blue Andaluza           | 10/26/2016 | 66 | 78 | 54  | 51 | 834,7  |
| Blue Andaluza           | 11/10/2016 | 75 | 70 | 70  | 59 | 967,7  |
| Blue Andaluza           | 11/16/2016 | 80 | 79 | 49  | 70 | 1098,7 |
| Quail Silver Castellana | 6/27/2016  | 70 |    | 75  |    | 4962,4 |
| Quail Silver Castellana | 7/4/2016   | 84 |    | 97  |    | 1576,5 |
| Quail Silver Castellana | 7/13/2016  | 95 |    | 79  |    | 954    |
| Quail Silver Castellana | 7/18/2016  | 85 | 59 | 40  | 71 | 1296,6 |
| Quail Silver Castellana | 8/17/2016  | 95 | 82 | 26  | 58 | 1417,5 |
| Quail Silver Castellana | 8/31/2016  | 81 | 75 | 67  | 52 | 1464,5 |
| Quail Silver Castellana | 9/12/2016  | 62 | 68 | 67  | 37 | 1848,4 |
| Quail Silver Castellana | 9/28/2016  | 84 | 77 | 45  | 30 | 1308,1 |
| Quail Silver Castellana | 10/10/2016 | 69 | 87 | 70  | 40 | 1655   |

|                         |            |    |    |    |    |        |
|-------------------------|------------|----|----|----|----|--------|
| Quail Silver Castellana | 10/24/2016 | 75 | 67 | 70 | 46 | 1094,9 |
| Quail Silver Castellana | 11/7/2016  | 69 | 52 | 64 | 44 | 833,1  |
| Quail Silver Castellana | 11/10/2016 | 70 | 60 | 55 | 55 | 735,3  |
| Quail Silver Castellana | 11/14/2016 | 83 | 57 | 55 | 47 | 559,1  |
| Red Villafranguina      | 6/20/2016  | 71 |    |    |    | 4377,3 |
| Red Villafranguina      | 6/27/2016  | 75 |    | 76 |    | 4317,4 |
| Red Villafranguina      | 7/4/2016   | 79 |    | 64 |    | 3878,5 |
| Red Villafranguina      | 7/13/2016  | 52 |    | 70 |    | 1083,8 |
| Red Villafranguina      | 7/27/2016  | 99 | 63 | 48 | 43 | 6010,4 |
| Red Villafranguina      | 8/17/2016  | 88 | 73 | 55 | 34 | 3500   |
| Red Villafranguina      | 8/31/2016  | 60 | 63 | 59 | 46 | 2096   |
| Red Villafranguina      | 9/12/2016  | 84 | 51 | 52 | 55 | 3494,3 |
| Red Villafranguina      | 9/28/2016  | 78 | 65 | 65 | 53 | 2494,9 |
| Red Villafranguina      | 10/10/2016 | 86 | 80 | 48 | 18 | 2010,2 |
| Red Villafranguina      | 10/24/2016 | 86 | 70 | 33 | 55 | 1632,9 |
| Red Villafranguina      | 11/7/2016  | 87 | 47 | 69 | 48 | 646,5  |
| Red Villafranguina      | 11/14/2016 | 83 | 61 | 62 | 49 | 486,2  |
| Red Villafranguina      | 11/21/2016 | 95 | 55 | 79 | 54 | 868,9  |
| Black-Barred Andaluza   | 6/20/2016  | 72 |    |    |    | 2950   |
| Black-Barred Andaluza   | 6/27/2016  | 78 |    | 77 |    | 2732   |
| Black-Barred Andaluza   | 7/4/2016   | 81 |    |    |    | 4048,7 |
| Black-Barred Andaluza   | 7/13/2016  | 89 |    | 50 |    | 430    |
| Black-Barred Andaluza   | 7/27/2016  | 98 | 66 | 46 | 74 | 931,6  |
| Black-Barred Andaluza   | 8/17/2016  | 79 | 78 | 35 | 44 | 2579,7 |
| Black-Barred Andaluza   | 8/31/2016  | 67 | 69 | 41 | 54 | 2310,3 |
| Black-Barred Andaluza   | 9/12/2016  | 83 | 78 | 58 |    | 1733,1 |
| Black-Barred Andaluza   | 9/21/2016  | 66 | 84 | 33 | 33 | 3279,8 |
| Black-Barred Andaluza   | 10/3/2016  | 84 | 86 | 47 | 48 | 2491,8 |
| Black-Barred Andaluza   | 10/24/2016 | 60 | 55 | 32 | 25 | 1286,9 |
| Black-Barred Andaluza   | 11/7/2016  | 87 | 47 | 59 | 57 | 588,8  |
| Black-Barred Andaluza   | 11/14/2016 | 81 | 82 | 59 | 62 | 1241,4 |
| Black-Barred Andaluza   | 11/21/2016 | 93 | 44 | 60 | 32 | 606,4  |
| White-Faced Spanish     | 6/20/2016  | 74 |    |    |    | 2248,6 |

|                     |            |    |    |    |    |        |
|---------------------|------------|----|----|----|----|--------|
| White-Faced Spanish | 6/27/2016  | 79 |    | 65 |    | 164,3  |
| White-Faced Spanish | 7/4/2016   |    |    | 51 |    | 2006,4 |
| White-Faced Spanish | 7/13/2016  | 90 |    | 32 |    | 1397,3 |
| White-Faced Spanish | 7/27/2016  | 67 | 56 | 32 | 48 | 1737,7 |
| White-Faced Spanish | 8/17/2016  | 76 | 70 | 54 | 48 | 2472,2 |
| White-Faced Spanish | 8/31/2016  | 78 | 70 | 57 | 44 | 2101   |
| White-Faced Spanish | 9/12/2016  | 81 | 48 | 51 | 44 | 1763,4 |
| White-Faced Spanish | 9/21/2016  | 74 | 70 | 51 | 44 | 2220,6 |
| White-Faced Spanish | 10/3/2016  | 75 | 73 | 56 | 45 | 3513,8 |
| White-Faced Spanish | 10/24/2016 | 64 | 34 | 57 | 56 | 937,9  |
| White-Faced Spanish | 11/7/2016  | 93 | 62 | 61 | 49 | 714,8  |
| White-Faced Spanish | 11/14/2016 | 92 | 61 | 56 | 45 | 383,9  |
| White-Faced Spanish | 11/21/2016 | 87 | 62 | 53 | 65 | 236,7  |
| Black Castellana    | 6/20/2016  | 64 |    |    |    | 3327,9 |
| Black Castellana    | 6/27/2016  | 83 |    | 70 |    | 2615,5 |
| Black Castellana    | 7/4/2016   | 84 |    | 87 |    | 1576,5 |
| Black Castellana    | 7/13/2016  | 91 |    |    |    | 994,3  |
| Black Castellana    | 7/27/2016  | 82 | 48 | 63 | 33 | 2857,4 |
| Black Castellana    | 8/17/2016  | 91 | 86 | 73 | 55 | 2561,8 |
| Black Castellana    | 8/31/2016  | 72 | 76 | 63 | 52 | 1076,1 |
| Black Castellana    | 9/12/2016  | 90 | 69 | 49 | 39 | 1906,1 |
| Black Castellana    | 9/28/2016  | 61 | 62 | 45 | 52 | 2722,5 |
| Black Castellana    | 10/10/2016 | 88 | 78 | 40 | 46 | 1731,4 |
| Black Castellana    | 10/24/2016 | 68 | 77 | 59 | 67 | 828,6  |
| Black Castellana    | 11/7/2016  | 70 | 54 | 59 | 43 | 1132,1 |
| Black Castellana    | 11/16/2016 | 95 | 58 | 64 | 73 | 742,1  |
| Black Castellana    | 11/21/2016 | 74 | 48 | 77 | 48 | 525,1  |
| Buff Prat           | 6/20/2016  | 69 |    |    |    | 3543,8 |
| Buff Prat           | 6/27/2016  | 60 |    | 75 |    | 3780   |
| Buff Prat           | 7/4/2016   | 72 |    |    |    | 3815,8 |
| Buff Prat           | 7/13/2016  | 89 |    | 78 |    | 3672,5 |
| Buff Prat           | 7/27/2016  | 85 |    | 41 | 43 | 2382,5 |
| Buff Prat           | 8/17/2016  | 88 | 74 | 42 | 35 | 2009,3 |

|           |            |    |    |    |    |        |
|-----------|------------|----|----|----|----|--------|
| Buff Prat | 8/31/2016  | 75 | 65 | 66 | 46 | 3559   |
| Buff Prat | 9/12/2016  | 88 | 87 | 65 | 37 | 1605,6 |
| Buff Prat | 9/28/2016  | 79 | 64 | 61 | 45 | 2164,1 |
| Buff Prat | 10/10/2016 | 71 | 70 | 44 | 43 | 1966,8 |
| Buff Prat | 10/24/2016 | 89 | 69 | 40 | 59 | 2998,7 |
| Buff Prat | 11/7/2016  | 94 | 79 | 73 | 70 | 560    |
| Buff Prat | 11/14/2016 | 90 | 71 | 66 | 51 | 814,9  |
| Buff Prat | 11/21/2016 | 92 | 67 | 80 | 67 | 1104,8 |
