# Supplementary material for: Seminal plasma amino acid profile in different breeds of chicken: Role of seminal plasma on sperm cryoresistance
Source: PubMed Central journal article supplement (PMC6319765; doi:10.1371/journal.pone.0209910), 2019-01-04
Supplement: pone.0209910.s005.pdf [file pone.0209910.s005.pdf]

S5 Dataset. Tunel + of sperm of 12 Spanish rooster breeds (fresh, frozen without plasma and frozen with plasma).

Year 2016

w/o/p= without plasma

w/p= with plasma

| Month     | Day | Rooster Breed         | TUNEL + (%) |     |       |
|-----------|-----|-----------------------|-------------|-----|-------|
|           |     |                       | Fresh       | w/p | w/o/p |
| September | 19  | Birchen Leonesa       | 13,5        |     | 18    |
| September | 21  | Birchen Leonesa       | 32          |     | 19    |
| October   | 3   | Birchen Leonesa       | 17,8        | 25  | 18    |
| October   | 17  | Birchen Leonesa       | 15          |     | 22    |
| October   | 26  | Birchen Leonesa       | 2           | 25  | 32    |
| November  | 16  | Birchen Leonesa       | 18,4        | 33  | 21    |
| November  | 21  | Birchen Leonesa       | 15          | 22  | 10    |
| November  | 22  | Birchen Leonesa       | 12          | 25  | 22    |
| June      | 20  | Black Castellana      |             | 30  |       |
| June      | 27  | Black Castellana      |             | 44  |       |
| July      | 4   | Black Castellana      |             | 21  |       |
| August    | 17  | Black Castellana      |             |     | 5     |
| August    | 31  | Black Castellana      |             | 10  | 12    |
| September | 10  | Black Castellana      | 1,8         |     | 23    |
| September | 26  | Black Castellana      | 7,2         |     |       |
| October   | 24  | Black Castellana      |             | 45  | 20    |
| November  | 7   | Black Castellana      |             | 22  | 21    |
| November  | 14  | Black Castellana      | 11,2        | 20  | 13    |
| November  | 16  | Black Castellana      | 5,3         | 23  | 5     |
| November  | 22  | Black Castellana      | 7           | 20  | 15    |
| July      | 11  | Black-Red Andaluza    |             | 20  |       |
| July      | 18  | Black-Red Andaluza    |             | 30  |       |
| September | 7   | Black-Red Andaluza    |             |     | 15    |
| September | 10  | Black-Red Andaluza    | 8,2         |     |       |
| September | 19  | Black-Red Andaluza    | 5           | 17  | 10    |
| September | 26  | Black-Red Andaluza    | 6,6         | 17  | 13    |
| October   | 10  | Black-Red Andaluza    |             | 20  | 7     |
| October   | 17  | Black-Red Andaluza    | 6           | 55  | 14    |
| October   | 26  | Black-Red Andaluza    | 3,5         | 35  | 20    |
| November  | 10  | Black-Red Andaluza    |             |     | 17    |
| November  | 16  | Black-Red Andaluza    | 2           | 18  | 5     |
| June      | 27  | Black-Barred Andaluza |             | 25  |       |
| August    | 17  | Black-Barred Andaluza |             |     | 7     |
| August    | 31  | Black-Barred Andaluza |             |     | 25    |
| September | 10  | Black-Barred Andaluza | 21          |     | 10    |
| September | 21  | Black-Barred Andaluza | 6,8         |     | 16    |
| October   | 3   | Black-Barred Andaluza | 3,9         | 32  | 13    |
| October   | 24  | Black-Barred Andaluza |             | 18  | 33    |
| November  | 14  | Black-Barred Andaluza | 12,6        | 25  | 22    |
| November  | 21  | Black-Barred Andaluza | 11          | 32  | 40    |
| November  | 22  | Black-Barred Andaluza | 14          | 21  | 15    |
| June      | 20  | Blue Andaluza         |             | 15  |       |
| July      | 4   | Blue Andaluza         |             | 27  |       |
| July      | 11  | Blue Andaluza         |             | 23  |       |

|           |    |                         |      |    |    |
|-----------|----|-------------------------|------|----|----|
| July      | 13 | Blue Andaluza           |      |    | 12 |
| September | 7  | Blue Andaluza           |      | 38 | 15 |
| September | 10 | Blue Andaluza           | 7,5  |    |    |
| September | 19 | Blue Andaluza           | 4    | 15 | 5  |
| September | 21 | Blue Andaluza           |      | 12 |    |
| September | 26 | Blue Andaluza           | 10   |    |    |
| October   | 17 | Blue Andaluza           | 3,5  |    |    |
| October   | 26 | Blue Andaluza           | 3    | 19 | 6  |
| November  | 16 | Blue Andaluza           | 15   | 36 | 7  |
| July      | 4  | Buff Prat               |      | 26 |    |
| July      | 11 | Buff Prat               |      | 10 |    |
| August    | 17 | Buff Prat               |      | 31 |    |
| August    | 31 | Buff Prat               |      |    | 12 |
| September | 10 | Buff Prat               | 13,9 |    |    |
| September | 26 | Buff Prat               | 5    | 31 | 18 |
| October   | 10 | Buff Prat               |      |    | 22 |
| October   | 24 | Buff Prat               |      | 27 | 10 |
| November  | 7  | Buff Prat               |      | 27 |    |
| November  | 14 | Buff Prat               | 12   | 27 | 15 |
| November  | 21 | Buff Prat               | 9    | 13 | 10 |
| November  | 22 | Buff Prat               | 8    | 31 | 20 |
| June      | 27 | Quail Castellana        |      | 16 |    |
| July      | 4  | Quail Castellana        |      | 10 |    |
| July      | 18 | Quail Castellana        |      | 12 |    |
| September | 7  | Quail Castellana        |      | 13 |    |
| September | 19 | Quail Castellana        | 11,6 |    |    |
| September | 21 | Quail Castellana        | 9,4  | 9  | 13 |
| October   | 3  | Quail Castellana        | 8,4  | 10 | 10 |
| October   | 17 | Quail Castellana        | 9,75 | 28 |    |
| October   | 26 | Quail Castellana        | 2    |    |    |
| November  | 10 | Quail Castellana        |      | 23 | 5  |
| November  | 16 | Quail Castellana        | 10,8 | 25 | 15 |
| July      | 11 | Quail Silver Castellana |      | 18 |    |
| July      | 13 | Quail Silver Castellana |      |    | 13 |
| August    | 17 | Quail Silver Castellana |      |    | 12 |
| August    | 31 | Quail Silver Castellana |      | 26 |    |
| September | 10 | Quail Silver Castellana | 2,3  |    | 18 |
| September | 26 | Quail Silver Castellana | 4,3  | 18 |    |
| October   | 10 | Quail Silver Castellana |      | 30 |    |
| October   | 24 | Quail Silver Castellana |      |    | 15 |
| November  | 7  | Quail Silver Castellana |      | 21 | 16 |
| November  | 10 | Quail Silver Castellana |      | 20 | 12 |
| November  | 14 | Quail Silver Castellana | 13,4 | 25 | 17 |
| July      | 11 | Red Villafranguina      |      | 40 |    |
| September | 10 | Red Villafranguina      | 8,5  |    | 9  |
| September | 26 | Red Villafranguina      | 9,8  | 17 | 15 |
| October   | 24 | Red Villafranguina      |      | 46 | 15 |
| October   | 26 | Red Villafranguina      |      |    | 10 |
| November  | 7  | Red Villafranguina      |      | 21 | 10 |
| November  | 14 | Red Villafranguina      | 11   | 26 | 20 |

|           |    |                     |      |    |    |
|-----------|----|---------------------|------|----|----|
| November  | 21 | Red Villafranquina  | 10   | 49 |    |
| November  | 22 | Red Villafranquina  | 10   | 24 | 21 |
| July      | 4  | Red-Barred Vasca    |      | 21 |    |
| September | 19 | Red-Barred Vasca    | 3,8  | 25 | 25 |
| September | 21 | Red-Barred Vasca    | 19   | 18 | 9  |
| October   | 3  | Red-Barred Vasca    | 7,2  |    | 16 |
| October   | 17 | Red-Barred Vasca    | 3,4  | 13 |    |
| October   | 26 | Red-Barred Vasca    | 2,9  | 45 | 20 |
| November  | 7  | Red-Barred Vasca    |      | 33 |    |
| June      | 27 | White-Faced Spanish |      | 33 |    |
| August    | 17 | White-Faced Spanish |      | 40 |    |
| August    | 31 | White-Faced Spanish |      |    | 28 |
| September | 7  | White-Faced Spanish |      |    | 18 |
| September | 10 | White-Faced Spanish | 42   |    | 22 |
| September | 21 | White-Faced Spanish | 24   | 35 |    |
| October   | 3  | White-Faced Spanish | 16   | 25 | 23 |
| November  | 7  | White-Faced Spanish |      | 14 |    |
| November  | 14 | White-Faced Spanish | 16   | 40 | 30 |
| November  | 21 | White-Faced Spanish | 22   | 25 | 15 |
| November  | 22 | White-Faced Spanish | 18   | 35 | 22 |
| June      | 20 | White Prat          |      | 20 |    |
| August    | 10 | White Prat          |      |    | 15 |
| August    | 17 | White Prat          |      | 50 |    |
| September | 19 | White Prat          | 12,2 |    |    |
| September | 21 | White Prat          | 1,5  | 22 | 12 |
| October   | 3  | White Prat          | 7,6  | 15 |    |
| October   | 17 | White Prat          | 2    | 17 | 14 |
| October   | 26 | White Prat          | 3    | 22 |    |
| November  | 10 | White Prat          |      | 18 |    |
| November  | 16 | White Prat          | 24   | 26 | 10 |
