# Supplementary material for: Seminal plasma amino acid profile in different breeds of chicken: Role of seminal plasma on sperm cryoresistance
Source: PLoS One. 2019 Jan 4;14(1):e0209910. doi: 10.1371/journal.pone.0209910 (PMC6319765; doi:10.1371/journal.pone.0209910)
Supplement: S4 Dataset — (PDF) [file pone.0209910.s004.pdf]

**S4 Dataset. Motility variables of sperm of 12 Spanish rooster breeds (fresh, frozen with plasma and frozen without plasma).**

**Rooster B Treatment**

1 = Blue Andaluza

2 = Black-Red Andaluza

3 = White-Faced Spanish

4= Quail Castellana

5 = Black Castellana

6 = Quail Silver Castellana

7 = Black-Barred Andaluza

8 = Birchen Leonesa

9 = White Prat

10 = Buff Prat

11= Red-Barred Vasca

12 = Red Villafranguina

1 = Fresh semen

2 = Frozen with plasma (w/p)

3 = Frozen without (w/o/p)

| Rooster Breed | Treatment | Date       | Motility % | score | Statics % | No progressive motiles % | Progressive Motiles % | Total Motiles % | VCL $\mu\text{m/s}$ | VSL $\mu\text{m/s}$ | VAP $\mu\text{m/s}$ | LIN % | STR % | WOB % | ALH $\mu\text{m}$ | BCF Hz |
|---------------|-----------|------------|------------|-------|-----------|--------------------------|-----------------------|-----------------|---------------------|---------------------|---------------------|-------|-------|-------|-------------------|--------|
| 1             | 1         | 6/20/2016  | 70,0       | 2,5   | 30,6      | 51,5                     | 17,8                  | 69,3            | 41,3                | 20,2                | 27,4                | 49,0  | 73,7  | 66,4  | 2,7               | 8,5    |
| 1             | 1         | 6/27/2016  | 90,0       | 3,5   | 11,4      | 28,5                     | 6,0                   | 34,5            | 71,9                | 51,0                | 57,4                | 70,9  | 88,8  | 79,9  | 2,6               | 10,0   |
| 1             | 1         | 7/4/2016   | 20,0       | 1,0   | 99,2      | 0,8                      | 0,0                   | 0,8             | 9,8                 | 0,4                 | 2,8                 | 4,0   | 14,1  | 28,0  | 0,0               | 0,0    |
| 1             | 1         | 7/13/2016  | 75,0       | 2,5   | 24,0      | 31,3                     | 44,7                  | 76,0            | 82,3                | 48,5                | 60,8                | 59,0  | 79,8  | 73,9  | 3,7               | 8,5    |
| 1             | 1         | 7/18/2016  | 95,0       | 3,0   | 20,7      | 37,9                     | 41,4                  | 79,3            | 38,7                | 23,3                | 31,3                | 60,3  | 74,6  | 80,8  | 1,4               | 4,1    |
| 1             | 1         | 8/10/2016  | 90,0       | 4,0   | 36,0      | 25,7                     | 38,3                  | 64,0            | 74,9                | 53,8                | 61,8                | 71,8  | 87,0  | 82,5  | 2,8               | 9,3    |
| 1             | 1         | 9/7/2016   | 80,0       | 4,0   | 9,3       | 21,1                     | 69,5                  | 90,6            | 111,1               | 87,3                | 97,8                | 78,5  | 89,3  | 88,0  | 2,5               | 9,2    |
| 1             | 1         | 9/19/2016  | 75,0       | 2,5   | 54,4      | 38,9                     | 6,6                   | 45,5            | 37,5                | 15,3                | 23,8                | 40,7  | 64,2  | 63,4  | 3,3               | 7,8    |
| 1             | 1         | 9/28/2016  | 85,0       | 3,0   | 17,9      | 41,1                     | 41,1                  | 82,2            | 81,5                | 50,2                | 64,6                | 61,6  | 77,7  | 79,3  | 2,8               | 8,7    |
| 1             | 1         | 10/10/2016 | 70,0       | 2,5   | 43,9      | 39,1                     | 17,0                  | 56,1            | 49,7                | 23,9                | 32,9                | 48,1  | 72,7  | 66,2  | 3,1               | 9,2    |
| 1             | 1         | 10/17/2016 | 90,0       | 3,5   | 17,3      | 32,7                     | 50,0                  | 82,7            | 89,2                | 57,7                | 68,6                | 64,7  | 84,1  | 76,9  | 2,9               | 8,4    |
| 1             | 1         | 10/26/2016 | 90,0       | 3,5   | 14,2      | 35,3                     | 50,5                  | 85,8            | 100,7               | 64,7                | 81,7                | 64,2  | 79,2  | 81,1  | 3,3               | 9,6    |
| 1             | 1         | 11/10/2016 | 95,0       | 3,5   | 12,4      | 27,8                     | 59,8                  | 87,6            | 99,1                | 72,2                | 84,6                | 72,9  | 85,4  | 85,4  | 2,8               | 9,3    |
| 1             | 1         | 11/16/2016 | 85,0       | 3,5   | 14,0      | 24,6                     | 61,4                  | 86,0            | 97,9                | 70,1                | 81,6                | 71,6  | 85,9  | 83,3  | 3,1               | 9,8    |

|   |   |            |      |     |      |      |      |      |       |      |      |      |      |      |     |      |
|---|---|------------|------|-----|------|------|------|------|-------|------|------|------|------|------|-----|------|
| 1 | 2 | 6/20/2016  | 75,0 | 3,0 | 64,0 | 33,0 | 3,0  | 36,0 | 30,7  | 9,9  | 17,2 | 32,2 | 57,3 | 56,2 | 3,0 | 6,9  |
| 1 | 2 | 6/27/2016  | 60,0 | 3,5 | 72,3 | 24,1 | 3,6  | 27,7 | 31,8  | 16,3 | 22,4 | 51,3 | 72,9 | 70,3 | 2,9 | 9,7  |
| 1 | 2 | 7/13/2016  | 90,0 | 3,0 | 17,6 | 54,9 | 27,9 | 82,8 | 60,3  | 28,2 | 39,3 | 46,8 | 71,8 | 65,1 | 3,0 | 8,8  |
| 1 | 2 | 7/18/2016  | 20,0 | 1,5 |      |      |      |      |       |      |      |      |      |      |     |      |
| 1 | 2 | 8/10/2016  | 80,0 | 2,5 | 42,9 | 39,5 | 17,6 | 57,1 | 51,4  | 27,2 | 35,8 | 52,8 | 75,9 | 69,5 | 2,9 | 9,3  |
| 1 | 2 | 9/7/2016   | 40,0 | 2,5 | 71,2 | 26,4 | 2,4  | 28,8 | 35,2  | 11,3 | 18,4 | 32,1 | 61,4 | 52,3 | 3,1 | 7,1  |
| 1 | 2 | 9/19/2016  | 70,0 | 3,0 | 42,0 | 32,7 | 25,3 | 58,0 | 64,0  | 42,1 | 50,0 | 65,8 | 84,2 | 78,2 | 2,6 | 9,9  |
| 1 | 2 | 9/28/2016  | 60,0 | 2,0 | 27,8 | 47,3 | 24,9 | 72,2 | 56,0  | 28,7 | 38,1 | 51,4 | 75,5 | 68,0 | 2,8 | 8,9  |
| 1 | 2 | 10/10/2016 | 50,0 | 3,0 | 78,6 | 14,1 | 7,3  | 21,4 | 52,5  | 40,1 | 45,4 | 76,4 | 88,3 | 86,6 | 2,0 | 8,6  |
| 1 | 2 | 10/17/2016 | 30,0 | 1,0 | 85,4 | 10,2 | 4,4  | 14,6 | 47,0  | 22,1 | 29,6 | 47,1 | 74,8 | 63,0 | 2,8 | 9,0  |
| 1 | 2 | 10/26/2016 | 70,0 | 2,0 | 69,7 | 17,9 | 12,4 | 30,3 | 63,2  | 41,1 | 48,6 | 65,0 | 84,5 | 77,0 | 2,4 | 10,3 |
| 1 | 2 | 11/10/2016 | 40,0 | 3,0 | 62,1 | 15,9 | 22,0 | 37,9 | 75,1  | 52,9 | 59,2 | 70,5 | 89,3 | 78,9 | 2,9 | 10,5 |
| 1 | 2 | 11/16/2016 | 45,0 | 3,0 | 80,7 | 9,5  | 9,8  | 19,3 | 65,0  | 47,2 | 51,8 | 72,6 | 91,2 | 79,6 | 2,7 | 8,8  |
| 1 | 3 | 7/18/2016  | 40,0 | 1,5 | 55,3 | 37,3 | 7,5  | 44,8 | 37,5  | 16,8 | 24,0 | 44,9 | 70,3 | 63,9 | 2,9 | 8,7  |
| 1 | 3 | 8/10/2016  | 75,0 | 2,0 | 30,9 | 52,4 | 16,7 | 69,1 | 48,4  | 21,8 | 31,9 | 45,1 | 68,5 | 65,8 | 2,8 | 8,4  |
| 1 | 3 | 9/7/2016   | 75,0 | 2,0 | 26,3 | 57,0 | 16,7 | 73,7 | 43,7  | 19,0 | 27,9 | 43,4 | 68,1 | 63,7 | 2,7 | 7,8  |
| 1 | 3 | 9/19/2016  | 40,0 | 2,0 | 74,3 | 21,6 | 4,1  | 25,7 | 35,6  | 15,8 | 22,7 | 44,5 | 69,9 | 63,7 | 2,7 | 8,1  |
| 1 | 3 | 9/28/2016  | 30,0 | 1,0 | 66,5 | 31,0 | 2,5  | 33,5 | 41,4  | 10,9 | 21,0 | 26,3 | 51,9 | 50,8 | 3,4 | 7,5  |
| 1 | 3 | 10/10/2016 | 50,0 | 2,5 | 70,3 | 21,3 | 8,4  | 29,7 | 48,8  | 26,7 | 34,4 | 54,7 | 77,5 | 70,6 | 2,5 | 5,8  |
| 1 | 3 | 10/17/2016 | 25,0 | 1,5 | 79,3 | 15,5 | 5,2  | 20,7 | 48,3  | 24,4 | 30,5 | 50,6 | 80,1 | 63,1 | 2,2 | 8,3  |
| 1 | 3 | 10/26/2016 | 40,0 | 2,5 | 68,3 | 22,2 | 9,5  | 31,7 | 54,8  | 28,3 | 37,4 | 51,7 | 75,7 | 68,2 | 2,9 | 9,0  |
| 1 | 3 | 11/10/2016 | 35,0 | 2,0 | 79,4 | 14,0 | 6,5  | 20,5 | 53,5  | 32,4 | 37,9 | 60,7 | 85,6 | 70,9 | 2,1 | 9,6  |
| 1 | 3 | 11/16/2016 | 40,0 | 3,0 | 80,7 | 9,5  | 9,8  | 19,3 | 65,0  | 47,2 | 51,8 | 72,6 | 91,2 | 79,6 | 2,7 | 8,8  |
| 2 | 1 | 6/20/2016  | 75   | 3,5 | 3,9  | 39,4 | 56,7 | 96,1 | 107,3 | 67,8 | 86,6 | 63,2 | 78,2 | 80,7 | 3,3 | 8,7  |
| 2 | 1 | 6/27/2016  | 80   | 3   | 24,4 | 51,1 | 24,4 | 75,5 | 51,1  | 32,7 | 39,2 | 64,0 | 83,3 | 76,8 | 2,7 | 9,7  |
| 2 | 1 | 7/4/2016   | 15   | 1   | 91,1 | 8,9  | 0    | 8,9  | 20,2  | 8,0  | 12,4 | 39,5 | 64,5 | 61,2 | 0,0 | 0,0  |
| 2 | 1 | 7/13/2016  |      |     | 60,9 | 29,1 | 10   | 39,1 | 44,2  | 23,9 | 30,0 | 54,0 | 79,7 | 67,8 | 2,8 | 10,1 |
| 2 | 1 | 7/18/2016  | 90   | 3   | 28,8 | 36,2 | 35   | 71,2 | 77,5  | 46,5 | 59,2 | 60,1 | 78,6 | 76,5 | 3,1 | 9,2  |
| 2 | 1 | 8/10/2016  | 50   | 3   | 37,1 | 32,6 | 30,3 | 62,9 | 65,5  | 43,5 | 52,2 | 66,4 | 83,3 | 79,7 | 2,8 | 9,7  |
| 2 | 1 | 9/7/2016   | 75   | 3   | 16,1 | 30,7 | 53,2 | 83,9 | 77,9  | 49,7 | 61,0 | 63,8 | 81,5 | 78,2 | 3,1 | 9,1  |
| 2 | 1 | 9/19/2016  | 75   | 2   | 57,7 | 37,7 | 4,6  | 42,3 | 34,2  | 11,0 | 19,7 | 32,2 | 55,9 | 57,7 | 3,2 | 7,6  |
| 2 | 1 | 9/28/2016  | 90   | 2   | 11,5 | 47,7 | 40,8 | 88,5 | 69,3  | 35,4 | 49,3 | 51,0 | 71,8 | 71,0 | 3,2 | 7,7  |
| 2 | 1 | 10/10/2016 | 85   | 3   | 9,6  | 43,8 | 46,6 | 90,4 | 89,9  | 52,8 | 69,2 | 58,7 | 76,3 | 77,0 | 3,5 | 8,7  |

|   |   |            |    |     |      |      |      |      |      |      |      |      |      |      |     |     |
|---|---|------------|----|-----|------|------|------|------|------|------|------|------|------|------|-----|-----|
| 2 | 1 | 10/17/2016 | 90 | 3,5 | 15   | 40,3 | 44,7 | 85   | 99,9 | 61,8 | 80,1 | 61,8 | 77,1 | 80,1 | 3,3 | 8,4 |
| 2 | 1 | 10/26/2016 | 90 | 3   | 6,5  | 31,2 | 62,3 | 93,5 | 94,9 | 62,4 | 77,9 | 65,7 | 80,1 | 82,1 | 3,1 | 8,8 |
| 2 | 1 | 11/10/2016 | 90 | 3   | 20,6 | 25,8 | 53,6 | 79,4 | 81,0 | 58,8 | 67,7 | 72,6 | 86,8 | 83,6 | 2,7 | 8,9 |
| 2 | 1 | 11/16/2016 | 85 | 3   | 11,5 | 32,9 | 55,6 | 88,5 | 79,7 | 48,4 | 61,8 | 60,7 | 78,3 | 77,6 | 3,0 | 8,4 |
| 2 | 2 | 6/20/2016  |    |     | 77,6 | 21,2 | 1,2  | 22,4 | 25,8 | 8,3  | 14,0 | 32,3 | 59,7 | 54,1 | 2,5 | 8,5 |
| 2 | 2 | 6/27/2016  | 40 | 1,5 | 57   | 38,2 | 4,8  | 43   | 32,0 | 12,9 | 20,1 | 40,3 | 64,3 | 62,7 | 2,7 | 7,5 |
| 2 | 2 | 7/4/2016   | 40 | 2   | 81,6 | 14,2 | 4,2  | 18,4 | 50,4 | 21,6 | 31,9 | 42,8 | 67,6 | 63,3 | 2,8 | 6,8 |
| 2 | 2 | 7/13/2016  | 90 | 2,5 | 37,2 | 52,5 | 10,3 | 62,8 | 44,9 | 17,3 | 28,1 | 38,5 | 61,4 | 62,7 | 3,2 | 6,7 |
| 2 | 2 | 7/18/2016  | 50 | 1,5 |      |      |      |      |      |      |      |      |      |      |     |     |
| 2 | 2 | 8/10/2016  | 85 | 2,5 | 24,9 | 55,8 | 19,3 | 75,1 | 56,7 | 23,0 | 35,3 | 40,6 | 65,2 | 62,3 | 3,2 | 7,6 |
| 2 | 2 | 9/7/2016   | 40 | 1,5 | 74,8 | 24,1 | 1    | 25,1 | 24,6 | 10,0 | 15,4 | 40,7 | 65,0 | 62,7 | 2,4 | 6,8 |
| 2 | 2 | 9/19/2016  | 30 | 1   | 67,5 | 25,7 | 6,7  | 32,4 | 43,1 | 22,6 | 29,3 | 52,5 | 77,1 | 68,1 | 2,7 | 9,1 |
| 2 | 2 | 9/28/2016  | 40 | 1   | 60,2 | 35,9 | 3,9  | 39,8 | 35,3 | 13,3 | 21,5 | 37,6 | 61,6 | 61,0 | 3,0 | 9,3 |
| 2 | 2 | 10/10/2016 | 40 | 1,5 | 78,5 | 16   | 5,5  | 21,5 | 43,5 | 21,2 | 29,8 | 48,6 | 71,1 | 68,4 | 3,0 | 8,7 |
| 2 | 2 | 10/17/2016 | 45 | 2   | 85,7 | 8,4  | 5,9  | 14,3 | 70,0 | 46,5 | 57,1 | 66,4 | 81,3 | 81,7 | 2,8 | 7,0 |
| 2 | 2 | 10/26/2016 | 35 | 1,5 | 79,7 | 13,6 | 6,7  | 20,3 | 49,2 | 31,3 | 38,9 | 63,7 | 80,5 | 79,1 | 2,3 | 9,0 |
| 2 | 2 | 11/10/2016 | 15 | 1   | 84,9 | 11,1 | 4    | 15,1 | 55,4 | 32,1 | 39,1 | 58,0 | 82,1 | 70,6 | 2,3 | 8,6 |
| 2 | 2 | 11/16/2016 | 40 | 2   | 87   | 9,6  | 3,4  | 13   | 53,0 | 29,1 | 37,9 | 54,8 | 76,8 | 71,4 | 2,6 | 9,9 |
| 2 | 3 | 7/18/2016  | 20 | 1,5 | 88,2 | 8,4  | 3,4  | 11,8 | 46,9 | 33,9 | 37,5 | 72,3 | 90,5 | 79,9 | 1,8 | 7,5 |
| 2 | 3 | 8/10/2016  | 60 | 1,5 | 37,4 | 56,7 | 5,9  | 62,6 | 40,1 | 12,9 | 22,8 | 32,1 | 56,5 | 56,9 | 3,4 | 6,4 |
| 2 | 3 | 9/7/2016   | 40 | 1   | 61,4 | 35,6 | 2,9  | 38,5 | 30,3 | 10,9 | 18,2 | 35,9 | 60,0 | 59,9 | 2,7 | 8,8 |
| 2 | 3 | 9/19/2016  | 40 | 1,5 | 75,5 | 21,7 | 2,8  | 24,5 | 35,3 | 13,7 | 21,8 | 38,8 | 62,7 | 61,9 | 2,5 | 8,0 |
| 2 | 3 | 9/28/2016  | 75 | 2   | 25,2 | 50,2 | 24,6 | 74,8 | 55,0 | 27,2 | 39,2 | 49,6 | 69,4 | 71,4 | 3,0 | 7,8 |
| 2 | 3 | 10/10/2016 | 40 | 1   | 84,0 | 11,8 | 4,1  | 15,9 | 45,4 | 25,2 | 31,6 | 55,4 | 79,5 | 69,7 | 2,2 | 8,2 |
| 2 | 3 | 10/17/2016 | 40 | 2   | 67,5 | 19,4 | 13,1 | 32,5 | 64,3 | 36,8 | 49,5 | 57,2 | 74,3 | 76,9 | 2,9 | 9,4 |
| 2 | 3 | 10/26/2016 | 40 | 2,5 | 82,7 | 14,3 | 3,0  | 17,3 | 50,0 | 33,9 | 39,1 | 67,7 | 86,7 | 78,1 | 1,6 | 8,2 |
| 2 | 3 | 11/10/2016 | 20 | 1,5 | 85,3 | 11,9 | 2,8  | 14,7 | 44,6 | 21,3 | 28,5 | 47,7 | 74,5 | 64,0 | 1,5 | 5,8 |
| 2 | 3 | 11/16/2016 | 65 | 3   | 39,9 | 43,6 | 16,5 | 60,1 | 48,4 | 29,0 | 36,3 | 59,8 | 79,8 | 75,0 | 2,5 | 9,2 |
| 3 | 1 | 6/20/2016  | 40 | 2   | 36,3 | 59,6 | 4,2  | 63,8 | 27,7 | 12,2 | 18,3 | 44,1 | 66,6 | 66,2 | 2,8 | 9,7 |
| 3 | 1 | 6/27/2016  | 30 | 2   | 69,5 | 28,9 | 1,6  | 30,5 | 26,1 | 12,4 | 16,9 | 47,3 | 73,0 | 64,8 | 1,9 | 5,7 |
| 3 | 1 | 7/4/2016   |    |     | 82,4 | 17,1 | 0,5  | 17,6 | 18,1 | 7,2  | 10,7 | 39,8 | 67,1 | 59,2 | 1,0 | 4,3 |
| 3 | 1 | 7/13/2016  | 90 | 2,5 | 55,4 | 39,6 | 5    | 44,6 | 36,4 | 15,9 | 23,6 | 43,6 | 67,2 | 64,9 | 2,7 | 8,8 |
| 3 | 1 | 7/27/2016  | 70 | 1,5 | 66   | 30,4 | 3,7  | 34,1 | 26,5 | 13,2 | 18,2 | 50,0 | 72,5 | 68,9 | 1,7 | 4,3 |

|   |   |            |    |     |      |      |      |      |      |      |      |      |      |      |     |      |
|---|---|------------|----|-----|------|------|------|------|------|------|------|------|------|------|-----|------|
| 3 | 1 | 8/17/2016  | 76 |     | 35   | 37,1 | 27,9 | 65   | 57,7 | 36,0 | 44,3 | 62,4 | 81,4 | 76,6 | 2,9 | 9,6  |
| 3 | 1 | 8/31/2016  | 80 | 2   | 43,8 | 37,1 | 19,1 | 56,2 | 51,2 | 28,7 | 36,1 | 56,0 | 79,5 | 70,5 | 2,9 | 9,3  |
| 3 | 1 | 9/12/2016  | 80 | 1,5 | 57,9 | 29,6 | 12,6 | 42,2 | 50,0 | 24,4 | 33,5 | 48,8 | 72,9 | 67,0 | 3,1 | 8,1  |
| 3 | 1 | 9/21/2016  | 80 | 3   | 51,6 | 34,4 | 14,1 | 48,5 | 44,9 | 24,9 | 32,9 | 55,3 | 75,6 | 73,2 | 3,0 | 8,1  |
| 3 | 1 | 10/3/2016  | 80 | 3   | 8    | 48,8 | 43,2 | 92   | 72,8 | 40,9 | 54,3 | 56,2 | 75,2 | 74,7 | 3,1 | 8,3  |
| 3 | 1 | 10/24/2016 | 70 | 1,5 | 38,7 | 32,5 | 28,8 | 61,3 | 54,3 | 30,8 | 38,8 | 56,8 | 79,5 | 71,4 | 2,8 | 9,7  |
| 3 | 1 | 11/7/2016  | 95 | 3,5 | 8,7  | 31,2 | 60,1 | 91,3 | 82,5 | 51,0 | 64,5 | 61,8 | 79,0 | 78,2 | 3,2 | 8,9  |
| 3 | 1 | 11/14/2016 | 80 | 2   | 16,7 | 31,6 | 51,6 | 83,2 | 81,0 | 56,8 | 66,3 | 70,1 | 85,6 | 81,9 | 3,0 | 9,4  |
| 3 | 1 | 11/21/2016 | 90 | 3,5 | 19,3 | 33,8 | 46,9 | 80,7 | 81,6 | 57,2 | 65,9 | 70,2 | 86,8 | 80,8 | 3,0 | 9,3  |
| 3 | 2 | 6/20/2016  |    |     | 59,5 | 36,4 | 4,1  | 40,5 | 31,8 | 10,9 | 17,8 | 34,1 | 61,0 | 55,9 | 2,9 | 9,6  |
| 3 | 2 | 6/27/2016  | 30 | 1   | 77,7 | 20,5 | 1,9  | 22,4 | 31,2 | 11,6 | 18,4 | 37,3 | 63,4 | 58,9 | 2,9 | 9,9  |
| 3 | 2 | 7/4/2016   | 20 | 1,5 | 77,9 | 19,5 | 2,6  | 22,1 | 29,3 | 12,2 | 17,6 | 41,5 | 69,2 | 59,9 | 3,2 | 9,1  |
| 3 | 2 | 7/13/2016  | 40 | 1   | 84   | 12,4 | 3,6  | 16   | 69,0 | 25,9 | 42,4 | 37,5 | 61,0 | 61,4 | 2,5 | 7,4  |
| 3 | 2 | 7/27/2016  | 80 | 2,5 | 41,5 | 45,2 | 13,2 | 58,4 | 43,1 | 20,8 | 29,9 | 48,3 | 69,6 | 69,4 | 2,8 | 7,4  |
| 3 | 2 | 8/17/2016  | 80 | 2,5 | 50,5 | 40,9 | 8,5  | 49,4 | 45,4 | 17,0 | 26,3 | 37,6 | 64,8 | 58,0 | 3,5 | 7,4  |
| 3 | 2 | 8/31/2016  | 80 | 2   | 34,6 | 47,2 | 18,2 | 65,4 | 51,1 | 24,9 | 34,7 | 48,8 | 71,8 | 68,0 | 3,0 | 8,1  |
| 3 | 2 | 9/12/2016  | 60 | 1,5 |      |      |      |      |      |      |      |      |      |      |     |      |
| 3 | 2 | 9/21/2016  | 80 | 2   | 29,9 | 57,8 | 12,3 | 70,1 | 44,5 | 19,7 | 29,2 | 44,3 | 67,5 | 65,7 | 2,7 | 8,4  |
| 3 | 2 | 10/3/2016  | 65 | 2   |      |      |      |      |      |      |      |      |      |      |     |      |
| 3 | 2 | 10/24/2016 | 40 | 2   |      |      |      |      |      |      |      |      |      |      |     |      |
| 3 | 2 | 11/7/2016  | 30 | 2   | 83,4 | 7,8  | 8,8  | 16,6 | 76,2 | 58,4 | 63,6 | 76,6 | 91,8 | 83,5 | 2,5 | 12,3 |
| 3 | 2 | 11/14/2016 | 30 | 2   | 82,5 | 8,4  | 9,1  | 17,5 | 60,7 | 43,3 | 47,9 | 71,2 | 90,2 | 79,0 | 2,3 | 7,2  |
| 3 | 2 | 11/21/2016 | 10 | 1   | 80,6 | 12,9 | 6,5  | 19,4 | 45,8 | 23,9 | 30,4 | 52,2 | 78,6 | 66,5 | 2,1 | 7,4  |
| 3 | 3 | 7/27/2016  | 35 | 1,5 |      |      |      |      |      |      |      |      |      |      |     |      |
| 3 | 3 | 8/17/2016  | 35 | 1,5 | 77,0 | 19,1 | 3,9  | 23,0 | 36,0 | 17,8 | 23,7 | 49,5 | 75,4 | 65,7 | 2,5 | 7,9  |
| 3 | 3 | 8/31/2016  | 30 | 2   | 48,8 | 41,9 | 9,3  | 51,2 | 37,9 | 17,2 | 24,9 | 45,5 | 69,2 | 65,7 | 2,8 | 8,9  |
| 3 | 3 | 9/12/2016  | 40 | 1,5 | 61,4 | 32,0 | 6,6  | 38,6 | 36,0 | 15,3 | 22,6 | 42,6 | 67,7 | 62,9 | 2,9 | 7,5  |
| 3 | 3 | 9/21/2016  | 50 | 1,5 | 68,5 | 26,4 | 5,1  | 31,5 | 39,3 | 17,5 | 25,1 | 44,6 | 69,7 | 64,0 | 2,8 | 8,9  |
| 3 | 3 | 10/3/2016  | 40 | 2   | 91,8 | 5,8  | 2,4  | 8,2  | 67   | 49,2 | 55,2 | 73,5 | 89,2 | 82,5 | 1,7 | 6,2  |
| 3 | 3 | 10/24/2016 | 30 | 3   | 88,0 | 7,7  | 4,3  | 12,0 | 54,0 | 26,4 | 33,7 | 49,0 | 78,6 | 62,3 | 2,4 | 4,1  |
| 3 | 3 | 11/7/2016  | 60 | 2,5 | 80,0 | 11,5 | 8,5  | 20,0 | 83,9 | 64,7 | 70,0 | 77,2 | 92,5 | 83,5 | 2,5 | 12,3 |
| 3 | 3 | 11/14/2016 | 20 | 1   | 88,6 | 7,8  | 3,6  | 11,4 | 49,1 | 31,4 | 35,5 | 63,9 | 88,5 | 72,3 | 1,6 | 3,9  |
| 3 | 3 | 11/21/2016 | 20 | 1,5 | 82,4 | 12,5 | 5,1  | 17,6 | 53,8 | 24,8 | 35,1 | 46,2 | 70,7 | 65,4 | 2,7 | 10,4 |

|   |   |            |    |     |      |      |      |      |       |       |       |      |      |      |     |      |
|---|---|------------|----|-----|------|------|------|------|-------|-------|-------|------|------|------|-----|------|
| 4 | 1 | 6/20/2016  | 85 | 4   | 2,8  | 23   | 74,2 | 97,2 | 130,1 | 101,8 | 115,4 | 78,3 | 88,2 | 88,7 | 3,0 | 9,9  |
| 4 | 1 | 6/27/2016  | 75 | 3   | 25,9 | 47,1 | 27,1 | 74,2 | 53,0  | 34,0  | 39,8  | 64,1 | 85,4 | 75,0 | 2,8 | 9,9  |
| 4 | 1 | 7/4/2016   | 40 | 1,5 | 65   | 33,8 | 1,3  | 35,1 | 22,0  | 11,5  | 15,3  | 52,3 | 75,4 | 69,3 | 1,2 | 6,7  |
| 4 | 1 | 7/13/2016  | 80 | 2,5 | 22,2 | 28,4 | 49,4 | 77,8 | 86,5  | 52,4  | 66,7  | 60,6 | 78,6 | 77,2 | 3,1 | 8,8  |
| 4 | 1 | 7/18/2016  | 90 | 3   |      |      |      |      |       |       |       |      |      |      |     |      |
| 4 | 1 | 8/10/2016  | 90 | 4,5 | 11,6 | 27,5 | 61   | 88,5 | 123,9 | 86,9  | 104,5 | 70,1 | 83,1 | 84,4 | 3,2 | 8,9  |
| 4 | 1 | 9/7/2016   | 90 | 4   | 7,7  | 31,1 | 61,2 | 92,3 | 101,0 | 68,9  | 82,1  | 68,2 | 83,9 | 81,3 | 3,0 | 9,4  |
| 4 | 1 | 9/19/2016  | 90 | 2,5 | 48,9 | 41,3 | 9,8  | 51,1 | 41,3  | 16,2  | 25,0  | 39,2 | 64,8 | 60,4 | 3,3 | 8,5  |
| 4 | 1 | 9/21/2016  | 70 | 3,5 | 16,7 | 35,1 | 48,2 | 83,3 | 76,7  | 51,5  | 62,6  | 67,1 | 82,2 | 81,6 | 2,9 | 9,2  |
| 4 | 1 | 10/3/2016  | 80 | 2,5 | 11   | 51,1 | 38   | 89,1 | 74,8  | 37,2  | 52,5  | 49,7 | 70,8 | 70,2 | 3,2 | 8,4  |
| 4 | 1 | 10/17/2016 | 90 | 3   | 5,4  | 42,4 | 52,2 | 94,6 | 103,6 | 61,0  | 81,0  | 58,9 | 75,3 | 78,2 | 3,5 | 8,9  |
| 4 | 1 | 10/26/2016 | 40 | 1,5 | 60,2 | 37,3 | 2,6  | 39,9 | 27,9  | 11,3  | 16,8  | 40,3 | 66,8 | 60,4 | 2,7 | 9,8  |
| 4 | 1 | 11/10/2016 | 90 | 3   | 10   | 21,4 | 68,5 | 89,9 | 105,3 | 79,5  | 89,2  | 75,5 | 89,1 | 84,7 | 2,8 | 10,1 |
| 4 | 1 | 11/16/2016 | 90 | 3,5 | 12,9 | 36   | 51   | 87   | 79,6  | 47,3  | 59,7  | 59,4 | 79,2 | 75,1 | 3,1 | 9,3  |
| 4 | 2 | 6/27/2016  | 75 | 2   | 49,8 | 46,7 | 3,5  | 50,2 | 32,1  | 11,4  | 19,3  | 35,4 | 59,0 | 60,0 | 2,9 | 8,6  |
| 4 | 2 | 7/13/2016  | 70 | 1,5 | 75,6 | 21,9 | 2,5  | 24,4 | 33,4  | 12,9  | 20,3  | 38,8 | 63,9 | 60,7 | 4,3 | 9,2  |
| 4 | 2 | 7/18/2016  | 40 | 1   | 55,9 | 38,4 | 5,7  | 44,1 | 34,8  | 14,0  | 20,7  | 40,3 | 67,7 | 59,5 | 2,8 | 8,2  |
| 4 | 2 | 8/10/2016  | 30 | 1,5 | 92,1 | 6    | 1,9  | 7,9  | 73,6  | 59,8  | 64,9  | 81,3 | 92,2 | 88,2 | 2,5 | 6,3  |
| 4 | 2 | 9/7/2016   | 80 | 2   | 47,8 | 46,3 | 5,9  | 52,2 | 40,1  | 13,6  | 22,5  | 33,9 | 60,4 | 56,0 | 2,6 | 8,4  |
| 4 | 2 | 9/19/2016  | 70 | 1,5 | 46,9 | 43,6 | 9,5  | 53,1 | 44,4  | 16,6  | 26,3  | 37,5 | 63,2 | 59,4 | 3,0 | 7,0  |
| 4 | 2 | 9/21/2016  | 40 | 2,5 | 43,8 | 41,1 | 15,1 | 56,2 | 50,2  | 24,5  | 33,3  | 48,8 | 73,6 | 66,3 | 3,2 | 8,3  |
| 4 | 2 | 10/3/2016  | 40 | 1,5 | 83,1 | 14,9 | 2    | 16,9 | 43,5  | 21,8  | 26,9  | 50,0 | 80,9 | 61,9 | 3,6 | 10,4 |
| 4 | 2 | 10/17/2016 | 30 | 1   | 83,6 | 13,8 | 2,7  | 16,5 | 40,0  | 20,8  | 25,6  | 51,9 | 81,2 | 64,0 | 3,4 | 6,7  |
| 4 | 2 | 10/26/2016 | 60 | 1,5 | 87,4 | 7,3  | 5,3  | 12,6 | 58,8  | 39,4  | 46,6  | 67,0 | 84,6 | 79,3 | 2,2 | 6,8  |
| 4 | 2 | 11/10/2016 | 70 | 2,5 | 50   | 25,4 | 24,6 | 50   | 64,9  | 42,3  | 49,4  | 65,1 | 85,7 | 76,0 | 2,8 | 9,6  |
| 4 | 2 | 11/16/2016 | 60 | 2,5 |      |      |      |      |       |       |       |      |      |      |     |      |
| 4 | 3 | 7/18/2016  | 70 | 1,5 | 70,8 | 20,3 | 9    | 29,3 | 55,4  | 36,6  | 42,5  | 66,0 | 86,0 | 76,8 | 3,0 | 6,4  |
| 4 | 3 | 8/10/2016  | 15 | 1   | 87,8 | 10,1 | 2,1  | 12,2 | 42,1  | 23,4  | 30,0  | 55,6 | 78,0 | 71,3 | 2,2 | 9,5  |
| 4 | 3 | 9/7/2016   | 45 | 1   | 52,4 | 37,3 | 10,3 | 47,6 | 40,9  | 19,4  | 26,5  | 47,4 | 73,3 | 64,7 | 2,8 | 9,6  |
| 4 | 3 | 9/19/2016  | 40 | 1,5 | 44,6 | 43,6 | 11,8 | 55,4 | 47,8  | 19,4  | 29,2  | 40,5 | 66,2 | 61,2 | 3,0 | 7,3  |
| 4 | 3 | 9/21/2016  | 55 | 1,5 | 51,4 | 35,1 | 13,5 | 48,6 | 45,3  | 23,8  | 31,7  | 52,6 | 75,1 | 70,0 | 2,7 | 8,0  |
| 4 | 3 | 10/3/2016  | 30 | 1   | 90,8 | 8,4  | 0,8  | 9,2  | 36,5  | 17,4  | 21,9  | 47,6 | 79,4 | 60,0 | 1,4 | 7,8  |
| 4 | 3 | 10/17/2016 | 30 | 1,5 | 87,4 | 10,9 | 1,7  | 12,6 | 42,0  | 18,9  | 26,1  | 44,9 | 72,2 | 62,2 | 3,3 | 3,4  |

|   |   |            |    |     |      |      |      |      |      |      |      |      |      |      |     |      |
|---|---|------------|----|-----|------|------|------|------|------|------|------|------|------|------|-----|------|
| 4 | 3 | 10/26/2016 | 40 | 1   | 88,3 | 8,5  | 3,2  | 11,7 | 48,9 | 21,8 | 33,0 | 44,5 | 66,0 | 67,5 | 2,4 | 8,4  |
| 4 | 3 | 11/10/2016 | 15 | 1   |      |      |      |      |      |      |      |      |      |      |     |      |
| 4 | 3 | 11/16/2016 | 30 | 1,5 | 29,6 | 45,0 | 25,4 | 70,4 | 47,2 | 31,3 | 37,0 | 66,3 | 84,5 | 78,5 | 2,5 | 8,6  |
| 5 | 1 | 6/20/2016  | 65 | 4   | 13,8 | 42,9 | 43,3 | 86,2 | 73,2 | 48,4 | 58,8 | 66,1 | 82,2 | 80,4 | 2,9 | 9,0  |
| 5 | 1 | 6/27/2016  | 5  | 1,5 | 81,3 | 18,7 | 0    | 18,7 | 20,8 | 6,3  | 11,3 | 30,2 | 55,9 | 54,1 | 0,0 | 0,0  |
| 5 | 1 | 7/4/2016   |    |     | 21,6 | 29,4 | 49   | 78,4 | 82,2 | 58,1 | 67,3 | 70,6 | 86,3 | 81,8 | 2,9 | 9,8  |
| 5 | 1 | 7/13/2016  | 90 | 2   | 23,7 | 23,7 | 52,6 | 76,3 | 80,7 | 61,9 | 68,2 | 76,7 | 90,8 | 84,5 | 2,7 | 9,6  |
| 5 | 1 | 7/27/2016  | 50 | 1,5 | 59,9 | 34,4 | 5,7  | 40,1 | 33,2 | 17,6 | 23,2 | 53,0 | 75,9 | 69,8 | 2,5 | 9,3  |
| 5 | 1 | 8/17/2016  | 50 | 3   | 44,3 | 42,3 | 13,4 | 55,7 | 43,3 | 24,5 | 31,5 | 56,5 | 77,8 | 72,7 | 2,5 | 8,8  |
| 5 | 1 | 8/31/2016  | 90 | 2   | 8,8  | 17   | 74,2 | 91,2 | 94,3 | 75,7 | 81,4 | 80,3 | 93,0 | 86,3 | 2,7 | 11,2 |
| 5 | 1 | 9/12/2016  | 85 | 2   | 24,8 | 58,6 | 16,6 | 75,2 | 51,3 | 25,1 | 34,8 | 48,9 | 72,2 | 67,7 | 2,9 | 8,5  |
| 5 | 1 | 9/28/2016  | 75 | 2,5 | 50,1 | 43,1 | 6,9  | 50   | 35,9 | 14,4 | 22,8 | 40,0 | 63,1 | 63,4 | 3,1 | 9,2  |
| 5 | 1 | 10/10/2016 | 90 | 3,5 | 12,4 | 32,8 | 54,9 | 87,7 | 97,4 | 73,0 | 82,4 | 74,9 | 88,5 | 84,6 | 3,0 | 9,8  |
| 5 | 1 | 10/24/2016 | 40 | 1   | 69,3 | 19,3 | 11,5 | 30,8 | 40,7 | 21,7 | 27,9 | 53,4 | 77,9 | 68,5 | 2,4 | 9,2  |
| 5 | 1 | 11/7/2016  | 85 | 3   | 9,7  | 38,6 | 51,7 | 90,3 | 77,6 | 45,6 | 58,2 | 58,8 | 78,3 | 75,0 | 3,2 | 8,6  |
| 5 | 1 | 11/16/2016 | 85 | 2   | 8,8  | 30,7 | 60,6 | 91,3 | 84,8 | 56,4 | 66,1 | 66,5 | 85,3 | 77,9 | 3,4 | 9,3  |
| 5 | 1 | 11/21/2016 | 65 | 2   | 41,5 | 38,4 | 20,1 | 58,5 | 56,1 | 30,7 | 41,2 | 54,7 | 74,6 | 73,4 | 2,8 | 9,4  |
| 5 | 2 | 6/20/2016  |    |     | 54,8 | 36,4 | 8,9  | 45,3 | 39,9 | 16,3 | 24,5 | 40,8 | 66,4 | 61,5 | 3,1 | 7,5  |
| 5 | 2 | 6/27/2016  | 60 | 1,5 | 76,1 | 21,8 | 2,1  | 23,9 | 30,0 | 10,7 | 17,2 | 35,5 | 61,9 | 57,4 | 2,7 | 7,5  |
| 5 | 2 | 7/4/2016   | 10 | 1   | 92,3 | 6,7  | 1    | 7,7  | 29,6 | 10,8 | 17,8 | 36,4 | 60,6 | 60,2 | 1,8 | 6,1  |
| 5 | 2 | 7/13/2016  | 60 | 1,5 | 70,1 | 27,3 | 2,7  | 30   | 29,9 | 11,4 | 17,7 | 38,1 | 64,5 | 59,1 | 3,6 | 8,5  |
| 5 | 2 | 7/27/2016  | 40 | 1   | 91,3 | 6,1  | 2,5  | 8,6  | 49,8 | 32,0 | 39,2 | 64,3 | 81,7 | 78,7 | 2,4 | 7,5  |
| 5 | 2 | 8/17/2016  | 75 | 2   | 82,5 | 16,9 | 0,7  | 17,6 | 31,5 | 8,1  | 15,0 | 25,7 | 53,8 | 47,7 | 1,3 | 5,1  |
| 5 | 2 | 8/31/2016  | 30 | 1,5 | 72,4 | 24,3 | 3,2  | 27,5 | 35,5 | 15,4 | 22,2 | 43,4 | 69,6 | 62,4 | 3,2 | 7,8  |
| 5 | 2 | 9/12/2016  | 30 | 1,5 |      |      |      |      |      |      |      |      |      |      |     |      |
| 5 | 2 | 9/28/2016  | 75 | 2,5 | 19,2 | 69,1 | 11,8 | 80,9 | 40,6 | 17,0 | 25,7 | 41,8 | 66,0 | 63,3 | 3,1 | 7,8  |
| 5 | 2 | 10/10/2016 | 40 | 3   | 85,5 | 8,2  | 6,3  | 14,5 | 75,0 | 53,4 | 59,3 | 71,2 | 90,0 | 79,1 | 3,0 | 9,0  |
| 5 | 2 | 10/24/2016 | 40 | 1,5 | 70,8 | 20,6 | 8,6  | 29,2 | 59,6 | 30,3 | 39,7 | 50,8 | 76,3 | 66,6 | 3,9 | 7,9  |
| 5 | 2 | 11/7/2016  | 35 | 2   | 79,5 | 11,6 | 9    | 20,6 | 64,6 | 48,7 | 53,7 | 75,4 | 90,7 | 83,1 | 2,6 | 10,0 |
| 5 | 2 | 11/16/2016 | 40 | 2,5 |      |      |      |      |      |      |      |      |      |      |     |      |
| 5 | 2 | 11/21/2016 | 5  | 1   |      |      |      |      |      |      |      |      |      |      |     |      |
| 5 | 3 | 7/27/2016  | 30 | 1   |      |      |      |      |      |      |      |      |      |      |     |      |
| 5 | 3 | 8/17/2016  | 40 | 2   | 38,6 | 44,9 | 16,5 | 61,4 | 54,1 | 24,9 | 35,3 | 46,1 | 70,6 | 65,3 | 3,1 | 8,0  |

|   |   |            |    |     |      |      |      |      |       |      |       |      |      |      |     |      |
|---|---|------------|----|-----|------|------|------|------|-------|------|-------|------|------|------|-----|------|
| 5 | 3 | 8/31/2016  | 40 | 2   | 49,3 | 34,3 | 16,4 | 50,7 | 44,5  | 23,0 | 30,2  | 51,6 | 76,0 | 67,9 | 3,0 | 10,2 |
| 5 | 3 | 9/12/2016  | 40 | 1   |      |      |      |      |       |      |       |      |      |      |     |      |
| 5 | 3 | 9/28/2016  | 75 | 2   | 44,9 | 37,1 | 18,0 | 55,1 | 49,1  | 27,3 | 34,8  | 55,6 | 78,6 | 70,8 | 2,9 | 8,8  |
| 5 | 3 | 10/10/2016 | 40 | 1   | 79,7 | 16,1 | 4,2  | 20,3 | 43,8  | 21,1 | 27,9  | 48,1 | 75,5 | 63,7 | 2,6 | 8,2  |
| 5 | 3 | 10/24/2016 | 40 | 2   | 84,7 | 8,1  | 7,3  | 15,4 | 64,2  | 42,7 | 50,3  | 66,6 | 84,9 | 78,4 | 2,2 | 7,6  |
| 5 | 3 | 11/7/2016  | 35 | 1   | 78,6 | 15,9 | 5,5  | 21,4 | 47,9  | 21,1 | 29,6  | 44,1 | 71,4 | 61,7 | 3,0 | 10,4 |
| 5 | 3 | 11/16/2016 | 40 | 3   | 61,6 | 25,2 | 13,2 | 38,4 | 52,7  | 36,1 | 41,6  | 68,5 | 86,9 | 78,8 | 2,1 | 9,3  |
| 5 | 3 | 11/21/2016 | 35 | 2   | 78,2 | 14,8 | 7,0  | 21,8 | 50,5  | 29,5 | 37,3  | 58,5 | 79,2 | 73,8 | 2,1 | 7,9  |
| 6 | 1 | 6/27/2016  | 60 | 2,5 | 29,4 | 60,7 | 9,8  | 70,5 | 35,5  | 17,3 | 24,4  | 48,9 | 71,2 | 68,7 | 2,5 | 8,1  |
| 6 | 1 | 7/4/2016   |    |     | 58,8 | 39   | 2,2  | 41,2 | 27,8  | 11,2 | 18,2  | 40,1 | 61,1 | 65,7 | 3,2 | 8,0  |
| 6 | 1 | 7/13/2016  | 95 | 3   | 42,5 | 25,2 | 32,3 | 57,5 | 55,0  | 34,8 | 40,9  | 63,2 | 85,1 | 74,3 | 2,8 | 9,7  |
| 6 | 1 | 7/18/2016  | 90 | 3   | 8,6  | 11,2 | 80,2 | 91,4 | 112,0 | 96,1 | 101,6 | 85,8 | 94,6 | 90,7 | 2,4 | 10,3 |
| 6 | 1 | 8/17/2016  | 50 | 2   | 44,2 | 41,5 | 14,3 | 55,8 | 39,5  | 21,1 | 27,8  | 53,5 | 75,9 | 70,4 | 2,9 | 10,2 |
| 6 | 1 | 8/31/2016  | 90 | 3,5 | 19,9 | 31,4 | 48,7 | 80,1 | 69,8  | 49,4 | 55,8  | 70,7 | 88,5 | 79,9 | 2,9 | 10,5 |
| 6 | 1 | 9/12/2016  | 90 | 2,5 | 14,4 | 39,4 | 46,2 | 85,6 | 78,5  | 47,8 | 59,0  | 60,9 | 81,0 | 75,1 | 3,1 | 9,7  |
| 6 | 1 | 9/28/2016  | 95 | 3   | 23,9 | 47,6 | 28,4 | 76   | 57,4  | 31,9 | 41,6  | 55,5 | 76,8 | 72,3 | 3,3 | 8,4  |
| 6 | 1 | 10/10/2016 | 85 | 2   | 37,6 | 47,3 | 15,1 | 62,4 | 47,7  | 25,4 | 34,4  | 53,1 | 73,7 | 72,1 | 3,2 | 8,3  |
| 6 | 1 | 10/24/2016 | 85 | 2,5 | 32,5 | 34,4 | 33,1 | 67,5 | 59,9  | 32,6 | 40,4  | 54,5 | 80,7 | 67,5 | 2,8 | 8,8  |
| 6 | 1 | 11/7/2016  | 70 | 2   | 29,3 | 49,2 | 21,5 | 70,7 | 48,8  | 25,1 | 33,1  | 51,5 | 75,8 | 67,9 | 3,1 | 9,3  |
| 6 | 1 | 11/10/2016 | 80 | 2,5 | 18,1 | 41,7 | 40,2 | 81,9 | 71,9  | 47,1 | 57,1  | 65,4 | 82,4 | 79,4 | 2,9 | 8,6  |
| 6 | 1 | 11/14/2016 | 85 | 2,5 | 17,9 | 25,7 | 56,4 | 82,1 | 73,4  | 48,3 | 56,0  | 65,7 | 86,2 | 76,2 | 3,1 | 9,6  |
| 6 | 2 | 6/27/2016  | 60 | 2   | 62,6 | 32,6 | 4,8  | 37,4 | 35,0  | 11,3 | 18,4  | 32,5 | 61,7 | 52,6 | 3,1 | 8,5  |
| 6 | 2 | 7/4/2016   | 70 | 1,5 | 55,2 | 28,3 | 16,5 | 44,8 | 49,6  | 21,8 | 31,3  | 44,0 | 69,6 | 63,2 | 2,8 | 8,6  |
| 6 | 2 | 7/13/2016  | 80 | 2,5 | 44,6 | 44,6 | 10,8 | 55,4 | 45,3  | 19,5 | 28,8  | 43,0 | 67,6 | 63,6 | 3,3 | 8,1  |
| 6 | 2 | 7/18/2016  | 40 | 1   | 52,5 | 42,4 | 5,1  | 47,5 | 44,7  | 13,8 | 24,6  | 30,8 | 56,0 | 55,0 | 2,9 | 7,8  |
| 6 | 2 | 8/17/2016  | 75 | 1,5 | 64   | 29,9 | 6,1  | 36   | 35,6  | 13,4 | 20,3  | 37,6 | 65,8 | 57,1 | 2,8 | 9,1  |
| 6 | 2 | 8/31/2016  | 85 | 2,5 | 43,7 | 49,7 | 6,6  | 56,3 | 37,8  | 12,1 | 21,1  | 31,9 | 57,1 | 55,9 | 3,2 | 7,2  |
| 6 | 2 | 9/12/2016  | 85 | 2,5 |      |      |      |      |       |      |       |      |      |      |     |      |
| 6 | 2 | 9/28/2016  | 75 | 2,5 | 38,1 | 41,3 | 20,6 | 61,9 | 59,3  | 29,3 | 40,0  | 49,3 | 73,2 | 67,4 | 2,9 | 9,1  |
| 6 | 2 | 10/10/2016 | 55 | 2,5 | 68,4 | 20   | 11,6 | 31,6 | 64,0  | 41,2 | 48,8  | 64,3 | 84,4 | 76,2 | 3,1 | 9,1  |
| 6 | 2 | 10/24/2016 | 20 | 1   | 80,1 | 15,2 | 4,7  | 19,9 | 45,4  | 14,5 | 24,2  | 31,9 | 59,8 | 53,3 | 1,8 | 4,7  |
| 6 | 2 | 11/7/2016  | 60 | 2   | 71   | 23,8 | 5,2  | 29   | 42,5  | 23,1 | 28,8  | 54,4 | 80,3 | 67,8 | 2,5 | 10,4 |
| 6 | 2 | 11/10/2016 | 30 | 1,5 | 65   | 18,2 | 16,7 | 34,9 | 62,6  | 42,4 | 47,6  | 67,7 | 89,0 | 76,1 | 2,7 | 9,8  |

|   |   |            |    |     |      |      |      |      |      |      |      |      |      |      |     |      |
|---|---|------------|----|-----|------|------|------|------|------|------|------|------|------|------|-----|------|
| 6 | 2 | 11/14/2016 | 15 | 1   | 90,9 | 6,9  | 2,2  | 9,1  | 43,6 | 17,6 | 23,7 | 40,3 | 74,2 | 54,3 | 1,6 | 6,4  |
| 6 | 3 | 7/18/2016  | 40 | 1   | 73,3 | 24,4 | 2,3  | 26,7 | 26,2 | 8,7  | 15,0 | 33,2 | 58,3 | 57,0 | 2,5 | 8,6  |
| 6 | 3 | 8/17/2016  | 40 | 1,5 | 69,1 | 27,0 | 3,9  | 30,9 | 35,1 | 17,0 | 24,3 | 48,4 | 69,9 | 69,2 | 2,8 | 9,8  |
| 6 | 3 | 8/31/2016  | 40 | 1   | 62,4 | 35,9 | 1,7  | 37,6 | 31,1 | 8,2  | 16,3 | 26,4 | 50,4 | 52,3 | 2,3 | 7,9  |
| 6 | 3 | 9/12/2016  | 30 | 1,5 | 74,8 | 21,3 | 3,9  | 25,2 | 32,1 | 15,9 | 21,3 | 49,5 | 74,6 | 66,4 | 2,6 | 9,1  |
| 6 | 3 | 9/28/2016  | 40 | 1,5 | 68,4 | 25,1 | 6,5  | 31,6 | 36,5 | 18,6 | 24,9 | 50,9 | 74,7 | 68,1 | 2,6 | 9,4  |
| 6 | 3 | 10/10/2016 | 60 | 1,5 | 76,9 | 19,1 | 4,0  | 23,1 | 38,3 | 19,1 | 26,5 | 49,9 | 72,1 | 69,3 | 2,3 | 9,5  |
| 6 | 3 | 10/24/2016 | 30 | 1   | 74,6 | 20,4 | 5,0  | 25,4 | 51,6 | 16,6 | 26,5 | 32,2 | 62,6 | 51,4 | 2,0 | 4,7  |
| 6 | 3 | 11/7/2016  | 15 | 2,5 | 82,1 | 11,1 | 6,8  | 17,9 | 77,7 | 56,3 | 63,3 | 72,5 | 89,0 | 81,4 | 2,1 | 9,6  |
| 6 | 3 | 11/10/2016 | 30 | 1,5 | 84,0 | 12,5 | 3,5  | 16   | 42,2 | 22,4 | 27,4 | 53,1 | 81,8 | 64,9 | 1,7 | 5,1  |
| 6 | 3 | 11/14/2016 | 50 | 1,5 | 91,6 | 5,4  | 3,0  | 8,4  | 46,4 | 19,6 | 28,5 | 42,1 | 68,7 | 61,3 | 2,2 | 6,7  |
| 7 | 1 | 6/20/2016  | 60 | 2,5 | 25,2 | 45   | 29,9 | 74,9 | 62,6 | 37,9 | 47,8 | 60,6 | 79,5 | 76,2 | 3,2 | 8,3  |
| 7 | 1 | 6/27/2016  | 18 | 2   | 79,4 | 19,6 | 0,9  | 20,5 | 24,0 | 10,5 | 14,5 | 43,8 | 72,3 | 60,6 | 1,5 | 7,4  |
| 7 | 1 | 7/4/2016   |    |     | 19,8 | 35,3 | 44,8 | 80,1 | 72,8 | 43,2 | 53,2 | 59,3 | 81,2 | 73,1 | 3,2 | 8,9  |
| 7 | 1 | 7/13/2016  | 80 | 2,5 | 67,3 | 19,2 | 13,5 | 32,7 | 30,8 | 11,4 | 16,0 | 36,8 | 71,1 | 51,8 | 1,1 | 4,2  |
| 7 | 1 | 7/27/2016  | 75 | 2,5 | 40,7 | 46,2 | 13,2 | 59,4 | 38,8 | 20,0 | 25,1 | 51,5 | 79,6 | 64,8 | 2,6 | 9,6  |
| 7 | 1 | 8/17/2016  | 75 | 4   | 19   | 35,6 | 54,4 | 90   | 88,3 | 63,4 | 73,9 | 71,9 | 85,8 | 83,8 | 3,1 | 9,8  |
| 7 | 1 | 8/31/2016  | 90 | 4   | 18,1 | 24,9 | 57,1 | 82   | 85,4 | 62,7 | 70,9 | 73,5 | 88,4 | 83,1 | 2,7 | 10,2 |
| 7 | 1 | 9/12/2016  | 85 | 2   | 24,8 | 58,6 | 16,6 | 75,2 | 43,4 | 20,6 | 29,0 | 47,4 | 71,0 | 66,8 | 2,7 | 9,0  |
| 7 | 1 | 9/21/2016  | 90 | 4   | 15,3 | 29,5 | 55,2 | 84,7 | 85,4 | 57,9 | 68,3 | 67,8 | 84,8 | 79,9 | 3,0 | 9,1  |
| 7 | 1 | 10/3/2016  | 80 | 3   | 5,9  | 42,2 | 51,9 | 94,1 | 80,1 | 40,9 | 56,5 | 51,1 | 72,4 | 70,6 | 3,2 | 8,4  |
| 7 | 1 | 10/24/2016 | 90 | 3   | 16,4 | 38,6 | 45,1 | 83,7 | 81,5 | 46,5 | 61,5 | 57,1 | 75,6 | 75,5 | 3,2 | 8,4  |
| 7 | 1 | 11/7/2016  | 85 | 2,5 | 25,4 | 43,1 | 31,5 | 74,6 | 55,4 | 31,4 | 39,4 | 56,7 | 79,7 | 71,1 | 2,9 | 9,6  |
| 7 | 1 | 11/14/2016 | 75 | 2   | 29   | 41,1 | 29,9 | 71   | 54,6 | 31,6 | 40,3 | 57,9 | 78,5 | 73,7 | 2,6 | 8,8  |
| 7 | 1 | 11/21/2016 | 70 | 2,5 | 43,2 | 30,8 | 25,9 | 56,7 | 63,0 | 40,8 | 48,3 | 64,7 | 84,4 | 76,7 | 3,1 | 9,0  |
| 7 | 2 | 6/27/2016  | 80 | 2   | 26,3 | 60,7 | 13   | 73,7 | 44,3 | 18,0 | 27,7 | 40,6 | 65,0 | 62,5 | 3,0 | 7,9  |
| 7 | 2 | 7/4/2016   | 75 | 2   | 37,5 | 56,3 | 6,1  | 62,4 | 42,4 | 13,7 | 24,4 | 32,3 | 56,3 | 57,5 | 3,3 | 6,3  |
| 7 | 2 | 7/13/2016  | 85 | 2   | 68,9 | 24,2 | 6,9  | 31,1 | 45,7 | 21,2 | 30,0 | 46,4 | 70,7 | 65,6 | 2,8 | 6,8  |
| 7 | 2 | 7/27/2016  | 60 | 2,5 | 65,8 | 21,8 | 12,3 | 34,1 | 62,2 | 43,5 | 51,3 | 69,9 | 84,9 | 82,4 | 2,4 | 8,4  |
| 7 | 2 | 8/17/2016  | 75 | 2   | 29,5 | 61,3 | 9,2  | 70,5 | 45,4 | 14,2 | 24,8 | 31,2 | 57,3 | 54,5 | 2,8 | 7,5  |
| 7 | 2 | 8/31/2016  | 70 | 2   | 32,6 | 49,8 | 17,7 | 67,5 | 51,3 | 24,3 | 34,3 | 47,4 | 71,0 | 66,9 | 3,4 | 8,7  |
| 7 | 2 | 9/12/2016  | 70 | 1,5 |      |      |      |      |      |      |      |      |      |      |     |      |
| 7 | 2 | 9/21/2016  | 40 | 2,5 | 62,9 | 23,9 | 13,2 | 37,1 | 59,8 | 35,4 | 44,0 | 59,3 | 80,6 | 73,6 | 2,6 | 8,1  |

|   |   |            |    |     |      |      |      |      |      |      |      |      |      |      |     |      |
|---|---|------------|----|-----|------|------|------|------|------|------|------|------|------|------|-----|------|
| 7 | 2 | 10/3/2016  | 40 | 3   | 86,4 | 10,6 | 3    | 13,6 | 47,9 | 25,6 | 32,5 | 53,4 | 78,8 | 67,8 | 2,4 | 5,7  |
| 7 | 2 | 10/24/2016 | 40 | 1,5 | 81,4 | 15,2 | 3,4  | 18,6 | 46,4 | 20,8 | 30,7 | 44,8 | 67,6 | 66,3 | 2,9 | 9,0  |
| 7 | 2 | 11/7/2016  | 40 | 1,5 | 84,2 | 9,1  | 6,8  | 15,9 | 49,1 | 32,3 | 37,6 | 65,7 | 85,9 | 76,5 | 2,2 | 7,5  |
| 7 | 2 | 11/14/2016 | 45 | 2   | 82,9 | 12,3 | 4,8  | 17,1 | 46,4 | 28,4 | 34,7 | 61,3 | 82,0 | 74,8 | 2,8 | 10,0 |
| 7 | 2 | 11/21/2016 | 35 | 1   | 88,1 | 9,8  | 2,1  | 11,9 | 34,6 | 18,3 | 21,6 | 53,0 | 84,9 | 62,4 | 2,0 | 6,5  |
| 7 | 3 | 7/27/2016  | 30 | 1,5 | 84   | 11,9 | 4,1  | 16   | 49,7 | 30,8 | 35,3 | 62,0 | 87,2 | 71,1 | 2,8 | 9,9  |
| 7 | 3 | 8/17/2016  | 30 | 1   | 66,3 | 30,6 | 3,1  | 33,7 | 30,8 | 11,1 | 17,8 | 36,0 | 62,2 | 57,9 | 2,8 | 8,4  |
| 7 | 3 | 8/31/2016  | 40 | 1,5 | 54,2 | 43,1 | 2,7  | 45,8 | 30,0 | 9,7  | 17,0 | 32,3 | 56,9 | 56,7 | 2,9 | 8,1  |
| 7 | 3 | 9/12/2016  | 35 | 1,5 |      |      |      |      |      |      |      |      |      |      |     |      |
| 7 | 3 | 9/21/2016  | 40 | 2,5 | 62,7 | 31,9 | 5,4  | 37,3 | 35,9 | 16,1 | 23,7 | 45,0 | 68,1 | 66,2 | 3,0 | 8,3  |
| 7 | 3 | 10/3/2016  | 40 | 1,5 | 74,5 | 22,5 | 3,0  | 25,5 | 38,9 | 12,3 | 21,1 | 31,6 | 58,5 | 54,1 | 2,8 | 6,6  |
| 7 | 3 | 10/24/2016 | 35 | 1,5 | 92,1 | 4,8  | 3,1  | 7,9  | 48,1 | 27,2 | 32,7 | 56,5 | 83,1 | 68,0 | 1,8 | 7,2  |
| 7 | 3 | 11/7/2016  | 20 | 1   | 78,2 | 17,9 | 3,9  | 21,8 | 38,3 | 17,6 | 23,4 | 45,8 | 75,1 | 61,0 | 2,3 | 6,4  |
| 7 | 3 | 11/14/2016 | 15 | 1   | 92,2 | 6,1  | 1,7  | 7,8  | 38,1 | 16,7 | 23,9 | 43,7 | 69,7 | 62,8 | 1,6 | 8,2  |
| 7 | 3 | 11/21/2016 | 40 | 1,5 | 73,7 | 19,8 | 6,5  | 26,3 | 39,4 | 23,6 | 27,7 | 59,9 | 85,1 | 70,3 | 2,6 | 9,1  |
| 8 | 1 | 6/20/2016  | 50 | 2,5 | 48   | 33,6 | 18,4 | 52   | 53,2 | 34,4 | 40,4 | 64,6 | 85,1 | 75,9 | 2,9 | 9,9  |
| 8 | 1 | 6/27/2016  | 70 | 3   | 28,1 | 43,4 | 28,5 | 71,9 | 54,3 | 38,7 | 43,9 | 71,2 | 88,1 | 80,8 | 2,6 | 9,1  |
| 8 | 1 | 7/4/2016   | 65 | 2   | 33,3 | 36,9 | 29,7 | 66,6 | 58,6 | 41,9 | 46,7 | 71,4 | 89,6 | 79,7 | 2,9 | 9,1  |
| 8 | 1 | 7/13/2016  | 70 | 2   | 36,4 | 43,8 | 19,8 | 63,6 | 62,5 | 25,9 | 38,6 | 41,5 | 67,2 | 61,8 | 3,5 | 8,9  |
| 8 | 1 | 7/18/2016  | 50 | 1,5 | 34,8 | 49,8 | 15,5 | 65,3 | 40,6 | 21,1 | 27,6 | 52,1 | 76,6 | 68,0 | 2,7 | 9,3  |
| 8 | 1 | 9/7/2016   | 30 | 1,5 | 84,4 | 13,9 | 1,6  | 15,5 | 26,6 | 10,0 | 14,5 | 37,4 | 68,8 | 54,3 | 2,8 | 10,3 |
| 8 | 1 | 9/19/2016  | 75 | 2   | 31,1 | 51   | 17,9 | 68,9 | 52,3 | 24,3 | 34,6 | 46,4 | 70,2 | 66,2 | 3,2 | 8,0  |
| 8 | 1 | 9/21/2016  | 60 | 3   | 28,8 | 27   | 44,1 | 71,1 | 91,0 | 69,6 | 78,2 | 76,5 | 89,0 | 85,9 | 2,9 | 9,7  |
| 8 | 1 | 10/3/2016  | 75 | 1,5 | 19,9 | 41,7 | 38,4 | 80,1 | 64,1 | 37,7 | 49,5 | 58,8 | 76,1 | 77,2 | 2,9 | 8,2  |
| 8 | 1 | 10/17/2016 | 75 | 3   | 59,8 | 19,3 | 20,9 | 40,2 | 71,8 | 56,1 | 61,0 | 78,1 | 91,9 | 85,0 | 2,6 | 9,9  |
| 8 | 1 | 10/26/2016 | 80 | 2   | 27   | 39,2 | 33,7 | 72,9 | 63,6 | 40,2 | 49,4 | 63,3 | 81,4 | 77,8 | 2,9 | 8,6  |
| 8 | 1 | 11/10/2016 | 85 | 3   | 18,5 | 29,3 | 52,2 | 81,5 | 76,2 | 53,2 | 61,8 | 69,9 | 86,1 | 81,2 | 2,7 | 9,1  |
| 8 | 1 | 11/16/2016 | 60 | 2   | 37   | 42,8 | 20,2 | 63   | 51,9 | 27,9 | 36,1 | 53,7 | 77,1 | 69,7 | 3,2 | 8,9  |
| 8 | 1 | 11/21/2016 | 55 | 2,5 | 70,8 | 24,7 | 4,5  | 29,2 | 31,7 | 14,6 | 20,4 | 46,0 | 71,4 | 64,4 | 2,9 | 9,1  |
| 8 | 2 | 6/20/2016  |    |     | 78,9 | 19,9 | 1,1  | 21   | 20,2 | 9,0  | 13,0 | 44,4 | 69,2 | 64,1 | 2,1 | 5,5  |
| 8 | 2 | 6/27/2016  | 50 | 2   |      |      |      |      |      |      |      |      |      |      |     |      |
| 8 | 2 | 7/4/2016   | 50 | 1   | 79,4 | 17,6 | 3    | 20,6 | 29,7 | 12,6 | 17,1 | 42,4 | 73,6 | 57,6 | 2,3 | 8,6  |
| 8 | 2 | 7/13/2016  | 75 | 1,5 | 71,9 | 21,9 | 6,3  | 28,2 | 34,1 | 17,5 | 22,4 | 51,2 | 78,0 | 65,6 | 2,5 | 10,1 |

|   |   |            |    |     |      |      |      |      |       |      |       |      |      |      |     |      |
|---|---|------------|----|-----|------|------|------|------|-------|------|-------|------|------|------|-----|------|
| 8 | 2 | 7/18/2016  | 65 | 1   | 19,2 | 69,1 | 11,8 | 80,9 | 40,6  | 17,0 | 25,7  | 41,8 | 66,0 | 63,3 | 3,1 | 7,8  |
| 8 | 2 | 9/7/2016   | 40 | 1,5 | 53   | 38,6 | 8,3  | 46,9 | 49,4  | 18,2 | 28,0  | 36,9 | 65,0 | 56,8 | 3,7 | 7,4  |
| 8 | 2 | 9/19/2016  | 85 | 2   | 36,3 | 45,7 | 18   | 63,7 | 49,0  | 24,7 | 33,4  | 50,3 | 73,8 | 68,2 | 3,0 | 8,6  |
| 8 | 2 | 9/21/2016  | 60 | 1   | 63,5 | 26,3 | 10,2 | 36,5 | 47,6  | 27,5 | 34,3  | 57,9 | 80,2 | 72,2 | 3,0 | 10,4 |
| 8 | 2 | 10/3/2016  | 70 | 2,5 | 58,2 | 28   | 13,8 | 41,8 | 49,0  | 29,0 | 36,0  | 59,3 | 80,6 | 73,6 | 2,8 | 7,4  |
| 8 | 2 | 10/17/2016 | 30 | 1   | 86   | 11,4 | 2,6  | 14   | 33,0  | 18,7 | 23,2  | 56,5 | 80,6 | 70,1 | 2,6 | 9,1  |
| 8 | 2 | 10/26/2016 | 30 | 2,5 | 91,3 | 6,7  | 2,1  | 8,8  | 43,4  | 34,7 | 38,0  | 79,9 | 91,4 | 87,4 | 0,9 | 5,4  |
| 8 | 2 | 11/10/2016 | 35 | 2   | 70,1 | 19   | 10,9 | 29,9 | 48,2  | 28,5 | 35,9  | 59,1 | 79,5 | 74,4 | 2,8 | 8,7  |
| 8 | 2 | 11/16/2016 | 50 | 2   | 69   | 19   | 12   | 31   | 52,4  | 35,6 | 42,3  | 67,9 | 84,0 | 80,8 | 2,4 | 8,6  |
| 8 | 2 | 11/21/2016 | 40 | 1,5 | 89,9 | 8,7  | 1,4  | 10,1 | 45,9  | 26,7 | 32,0  | 58,3 | 83,6 | 69,7 | 2,3 | 8,2  |
| 8 | 3 | 7/18/2016  | 30 | 1   | 80,6 | 17,8 | 1,7  | 19,5 | 31,0  | 14,4 | 21,4  | 46,3 | 67,0 | 69,1 | 2,6 | 9,1  |
| 8 | 3 | 9/7/2016   | 40 | 2   | 48,9 | 47,5 | 3,6  | 51,1 | 29,9  | 10,5 | 17,5  | 35,1 | 60,0 | 58,4 | 3,1 | 6,7  |
| 8 | 3 | 9/19/2016  | 40 | 1,5 | 58,0 | 35,7 | 6,4  | 42,1 | 39,5  | 15,0 | 23,9  | 38,1 | 62,9 | 60,5 | 3,0 | 6,9  |
| 8 | 3 | 9/21/2016  | 30 | 1   | 68,1 | 26,9 | 5,0  | 31,9 | 36,5  | 17,1 | 23,8  | 46,7 | 71,7 | 65,1 | 2,8 | 8,7  |
| 8 | 3 | 10/3/2016  | 20 | 1,5 | 72,2 | 21,6 | 6,3  | 27,9 | 43,2  | 23,3 | 30,6  | 53,9 | 75,9 | 70,9 | 2,5 | 9,1  |
| 8 | 3 | 10/17/2016 | 20 | 18  | 85,0 | 11,0 | 4,0  | 15   | 44,9  | 25,4 | 31,3  | 56,7 | 81,4 | 69,7 | 2,0 | 8,6  |
| 8 | 3 | 10/26/2016 | 40 | 2,5 | 86,7 | 12,1 | 1,2  | 13,3 | 33,7  | 17,5 | 21,8  | 52,0 | 80,3 | 64,7 | 1,6 | 4,9  |
| 8 | 3 | 11/10/2016 | 30 | 1,5 | 77,0 | 15,0 | 8,0  | 23   | 47,1  | 24,0 | 30,9  | 51,1 | 77,9 | 65,6 | 2,3 | 8,9  |
| 8 | 3 | 11/16/2016 | 40 | 2,5 | 80,1 | 14,5 | 5,5  | 20   | 49,3  | 33,3 | 38,8  | 67,7 | 85,9 | 78,8 | 2,6 | 10,1 |
| 8 | 3 | 11/21/2016 | 30 | 1   | 86,3 | 13   | 0,7  | 13,7 | 28,6  | 14,6 | 20,9  | 51,0 | 69,8 | 73,0 | 1,2 | 6,0  |
| 9 | 1 | 6/20/2016  | 75 | 3,5 | 9,4  | 31,3 | 59,4 | 90,7 | 78,1  | 56,1 | 64,1  | 71,8 | 87,4 | 82,1 | 2,7 | 9,2  |
| 9 | 1 | 6/27/2016  | 75 | 3,5 | 14,8 | 44,5 | 40,6 | 85,1 | 67,0  | 47,6 | 54,3  | 71,0 | 87,6 | 81,1 | 2,5 | 9,4  |
| 9 | 1 | 7/4/2016   | 75 | 2,5 | 57,1 | 39,1 | 3,8  | 42,9 | 27,2  | 13,8 | 17,6  | 51,0 | 78,5 | 64,9 | 2,5 | 8,5  |
| 9 | 1 | 7/13/2016  | 70 | 2,5 | 49,2 | 30,9 | 19,9 | 50,8 | 61,9  | 39,0 | 47,3  | 63,0 | 82,5 | 76,4 | 3,1 | 9,4  |
| 9 | 1 | 7/18/2016  | 80 | 2   |      |      |      |      |       |      |       |      |      |      |     |      |
| 9 | 1 | 8/10/2016  | 80 | 4   | 14,7 | 32,8 | 52,5 | 85,3 | 87,2  | 63,3 | 72,5  | 72,6 | 87,3 | 83,2 | 2,7 | 9,4  |
| 9 | 1 | 9/7/2016   | 80 | 3,5 | 9    | 24,6 | 66,5 | 91,1 | 116,5 | 86,8 | 100,7 | 74,5 | 86,2 | 86,4 | 2,9 | 8,7  |
| 9 | 1 | 9/19/2016  | 90 | 3   | 14,4 | 28,4 | 57,2 | 85,6 | 80,6  | 59,8 | 66,9  | 74,1 | 89,3 | 83,0 | 2,7 | 10,0 |
| 9 | 1 | 9/21/2016  | 70 | 3,5 | 6,1  | 22,1 | 71,8 | 93,9 | 122,1 | 97,4 | 108,9 | 79,7 | 89,4 | 89,2 | 2,8 | 9,0  |
| 9 | 1 | 10/3/2016  | 85 | 3   | 5,7  | 39,7 | 54,6 | 94,3 | 88,8  | 53,1 | 67,6  | 59,8 | 78,6 | 76,1 | 3,2 | 9,0  |
| 9 | 1 | 10/17/2016 | 60 | 2   | 70,5 | 25,1 | 4,3  | 29,4 | 33,0  | 13,2 | 19,5  | 40,1 | 67,8 | 59,2 | 2,7 | 8,8  |
| 9 | 1 | 10/26/2016 | 90 | 3   | 23,4 | 36,6 | 39,9 | 76,5 | 71,7  | 48,6 | 57,0  | 67,8 | 85,2 | 79,5 | 3,1 | 9,5  |
| 9 | 1 | 11/10/2016 | 85 | 2,5 | 7,5  | 28   | 64,5 | 92,5 | 97,1  | 77,6 | 86,0  | 79,9 | 90,2 | 88,5 | 2,6 | 9,9  |

|    |   |            |    |     |      |      |      |      |       |      |      |      |      |      |     |      |
|----|---|------------|----|-----|------|------|------|------|-------|------|------|------|------|------|-----|------|
| 9  | 1 | 11/16/2016 | 40 | 1   | 67,1 | 30,4 | 2,4  | 32,8 | 28,3  | 12,9 | 18,0 | 45,8 | 72,0 | 63,6 | 1,8 | 8,0  |
| 9  | 2 | 6/20/2016  | 75 | 1,5 | 74,5 | 32,2 | 2,3  | 34,5 | 33,0  | 13,3 | 20,2 | 40,5 | 66,0 | 61,3 | 2,6 | 8,2  |
| 9  | 2 | 6/27/2016  | 40 | 1,5 | 82,3 | 17,2 | 0,5  | 17,7 | 21,7  | 6,9  | 11,2 | 31,7 | 61,4 | 51,6 | 1,2 | 3,6  |
| 9  | 2 | 7/4/2016   | 65 | 1,5 | 56   | 33,6 | 10,4 | 44   | 43,6  | 20,9 | 30,2 | 48,0 | 69,2 | 69,3 | 2,7 | 7,6  |
| 9  | 2 | 7/13/2016  | 50 | 1   | 68,6 | 28,4 | 3    | 31,4 | 35,0  | 14,1 | 22,2 | 40,3 | 63,6 | 63,4 | 2,8 | 11,0 |
| 9  | 2 | 7/18/2016  | 80 | 2   | 78,4 | 17,2 | 4,4  | 21,6 | 46,0  | 26,5 | 32,0 | 57,6 | 82,7 | 69,6 | 2,9 | 5,9  |
| 9  | 2 | 8/10/2016  | 50 | 1,5 | 47,9 | 41,3 | 10,8 | 52,1 | 45,5  | 17,3 | 27,1 | 38,0 | 63,9 | 59,6 | 2,9 | 8,3  |
| 9  | 2 | 9/7/2016   | 75 | 1,5 | 64,2 | 32,5 | 3,3  | 35,8 | 32,2  | 11,1 | 18,1 | 34,5 | 61,2 | 56,3 | 3,0 | 7,1  |
| 9  | 2 | 9/19/2016  | 50 | 1,5 | 60,2 | 26,4 | 13,4 | 39,8 | 47,7  | 28,7 | 34,6 | 60,1 | 82,9 | 72,5 | 2,6 | 10,4 |
| 9  | 2 | 9/21/2016  | 30 | 1   | 57,8 | 33,4 | 8,7  | 42,1 | 35,6  | 18,9 | 24,7 | 53,1 | 76,5 | 69,4 | 2,5 | 8,3  |
| 9  | 2 | 10/3/2016  | 70 | 2   | 67,4 | 26,9 | 5,8  | 32,7 | 40,8  | 21,5 | 26,8 | 52,6 | 80,1 | 65,7 | 3,1 | 7,2  |
| 9  | 2 | 10/17/2016 | 30 | 1   | 87,7 | 10,8 | 1,4  | 12,2 | 28,9  | 9,4  | 14,1 | 32,5 | 66,4 | 49,0 | 2,6 | 9,1  |
| 9  | 2 | 10/26/2016 | 45 | 2   | 76,3 | 18,2 | 5,6  | 23,8 | 45,5  | 26,0 | 32,1 | 57,2 | 81,1 | 70,6 | 2,5 | 9,2  |
| 9  | 2 | 11/10/2016 | 45 | 2,5 | 52,3 | 23,6 | 24,1 | 47,7 | 68,5  | 49,0 | 54,4 | 71,5 | 90,1 | 79,4 | 2,2 | 10,6 |
| 9  | 2 | 11/16/2016 | 10 | 2   | 92,2 | 5    | 2,8  | 7,8  | 87,6  | 76,3 | 79,2 | 87,1 | 96,4 | 90,4 | 1,7 | 7,2  |
| 9  | 3 | 7/18/2016  | 40 | 2   | 78,4 | 17,2 | 4,4  | 21,6 | 46,0  | 26,5 | 32,0 | 57,6 | 82,7 | 69,6 | 2,9 | 5,9  |
| 9  | 3 | 8/10/2016  | 40 | 1,5 | 46,0 | 46,2 | 7,8  | 54   | 37,9  | 13,7 | 21,4 | 36,2 | 64,2 | 56,5 | 3,1 | 7,5  |
| 9  | 3 | 9/7/2016   | 50 | 1,5 | 38,1 | 51,6 | 10,3 | 61,9 | 39,6  | 16,7 | 25,2 | 42,1 | 66,2 | 63,6 | 3,0 | 7,2  |
| 9  | 3 | 9/19/2016  | 40 | 1   | 61,2 | 31,6 | 7,2  | 38,8 | 37,1  | 19,1 | 25,0 | 51,3 | 76,3 | 67,3 | 2,6 | 8,6  |
| 9  | 3 | 9/21/2016  | 60 | 2,5 | 13,7 | 70,5 | 15,8 | 86,3 | 49,0  | 20,1 | 31,4 | 41,0 | 64,0 | 64,1 | 3,2 | 7,6  |
| 9  | 3 | 10/3/2016  | 30 | 2   | 83,5 | 14,1 | 2,5  | 16,6 | 41,2  | 23,6 | 29,6 | 57,2 | 79,7 | 71,8 | 2,9 | 8,4  |
| 9  | 3 | 10/17/2016 | 25 | 1,5 | 69,7 | 21,9 | 8,4  | 30,3 | 50,2  | 27,4 | 34,7 | 54,7 | 79,1 | 69,1 | 2,8 | 9,5  |
| 9  | 3 | 10/26/2016 | 30 | 2   | 90,2 | 7,3  | 2,6  | 9,9  | 43,4  | 29,5 | 33,8 | 68,1 | 87,4 | 77,9 | 1,4 | 5,0  |
| 9  | 3 | 11/10/2016 | 10 | 1   | 87,7 | 8,3  | 4,0  | 12,3 | 52,9  | 29,0 | 34,9 | 54,8 | 83,1 | 65,9 | 1,2 | 5,8  |
| 9  | 3 | 11/16/2016 | 20 | 1,5 | 87   | 10,8 | 2,2  | 13   | 36,4  | 16,9 | 21,8 | 46,6 | 77,7 | 59,9 | 1,7 | 6,8  |
| 10 | 1 | 6/20/2016  | 60 | 4   | 28,5 | 39,5 | 32   | 71,5 | 77,6  | 46,7 | 59,9 | 60,1 | 78,0 | 77,1 | 3,1 | 8,3  |
| 10 | 1 | 6/27/2016  | 20 | 1,5 | 83,3 | 16,5 | 0,2  | 16,7 | 21,9  | 8,3  | 12,1 | 37,7 | 68,0 | 55,3 | 1,5 | 2,5  |
| 10 | 1 | 7/4/2016   |    |     | 14,7 | 34,6 | 50,6 | 85,2 | 95,3  | 63,0 | 77,0 | 66,1 | 81,8 | 80,8 | 3,3 | 8,9  |
| 10 | 1 | 7/13/2016  | 90 | 3   | 43   | 35,9 | 21,1 | 57   | 60,3  | 37,7 | 45,7 | 62,6 | 82,5 | 75,9 | 3,0 | 8,4  |
| 10 | 1 | 7/27/2016  | 50 |     | 47,6 | 38,6 | 13,9 | 52,5 | 41,6  | 23,4 | 29,4 | 56,2 | 79,4 | 70,8 | 2,7 | 9,6  |
| 10 | 1 | 8/17/2016  | 85 | 4   | 16,6 | 31,1 | 52,3 | 83,4 | 107,0 | 66,8 | 85,0 | 62,5 | 78,7 | 79,4 | 3,4 | 9,1  |
| 10 | 1 | 8/31/2016  | 90 | 2   | 26,4 | 31,4 | 42,2 | 73,6 | 90,4  | 58,8 | 72,1 | 65,1 | 81,6 | 79,7 | 3,2 | 9,2  |
| 10 | 1 | 9/12/2016  | 85 | 2   | 26   | 51,2 | 22,8 | 74   | 58,9  | 30,6 | 41,5 | 51,9 | 73,6 | 70,5 | 3,3 | 9,1  |

|    |   |            |    |     |      |      |      |      |      |      |      |      |      |      |     |      |
|----|---|------------|----|-----|------|------|------|------|------|------|------|------|------|------|-----|------|
| 10 | 1 | 9/28/2016  | 80 | 2,5 | 18,1 | 56,7 | 25,2 | 81,9 | 57,8 | 30,3 | 41,5 | 52,4 | 72,9 | 71,9 | 3,1 | 7,8  |
| 10 | 1 | 10/10/2016 | 80 | 2,5 | 41,8 | 33,1 | 25,1 | 58,2 | 57,4 | 35,1 | 43,4 | 61,1 | 80,8 | 75,6 | 2,8 | 8,8  |
| 10 | 1 | 10/24/2016 | 70 | 1,5 | 56,4 | 31   | 12,5 | 43,5 | 45,5 | 20,0 | 28,1 | 44,0 | 71,1 | 61,8 | 2,8 | 8,7  |
| 10 | 1 | 11/7/2016  | 85 | 3   | 19,5 | 33,6 | 46,9 | 80,5 | 88,4 | 59,6 | 71,7 | 67,4 | 83,2 | 81,0 | 2,7 | 9,8  |
| 10 | 1 | 11/14/2016 | 90 | 3,5 | 16,9 | 30,4 | 52,6 | 83   | 80,6 | 53,3 | 63,6 | 66,1 | 83,7 | 78,9 | 3,1 | 9,7  |
| 10 | 1 | 11/21/2016 | 90 | 3   | 8,6  | 34,8 | 56,5 | 91,3 | 96,9 | 64,1 | 77,6 | 66,2 | 82,6 | 80,1 | 3,5 | 9,0  |
| 10 | 2 | 6/27/2016  | 60 | 2   | 74,3 | 23,7 | 2    | 25,7 | 25,1 | 10,4 | 15,6 | 41,5 | 67,0 | 61,9 | 2,6 | 11,0 |
| 10 | 2 | 7/4/2016   | 80 | 2   | 60,9 | 36,5 | 2,5  | 39   | 34,9 | 10,6 | 18,6 | 30,4 | 56,8 | 53,4 | 2,7 | 9,2  |
| 10 | 2 | 7/13/2016  | 85 | 2,5 | 55,3 | 36,2 | 8,5  | 44,7 | 45,3 | 17,8 | 27,7 | 39,2 | 64,1 | 61,1 | 3,0 | 8,1  |
| 10 | 2 | 7/27/2016  | 65 | 2,5 | 60,3 | 26,8 | 12,9 | 39,7 | 56,3 | 37,7 | 43,9 | 67,0 | 85,9 | 78,0 | 2,9 | 10,0 |
| 10 | 2 | 8/17/2016  | 75 | 2   | 43,3 | 43,7 | 13   | 56,7 | 48,0 | 20,8 | 31,2 | 43,3 | 66,5 | 65,1 | 3,0 | 8,0  |
| 10 | 2 | 8/31/2016  | 30 | 1   | 83,4 | 16   | 0,7  | 16,7 | 24,0 | 7,8  | 13,1 | 32,4 | 59,2 | 54,8 | 2,5 | 10,5 |
| 10 | 2 | 9/12/2016  | 75 | 1   |      |      |      |      |      |      |      |      |      |      |     |      |
| 10 | 2 | 9/28/2016  | 80 | 2   | 29,9 | 44,4 | 25,8 | 70,2 | 58,5 | 31,5 | 41,5 | 53,8 | 75,8 | 71,0 | 2,9 | 8,4  |
| 10 | 2 | 10/10/2016 | 50 | 3   | 63,8 | 19,6 | 16,6 | 36,2 | 66,9 | 45,6 | 53,8 | 68,1 | 84,7 | 80,4 | 2,9 | 8,3  |
| 10 | 2 | 10/24/2016 | 45 | 2   | 72,2 | 22,6 | 5,2  | 27,8 | 40,2 | 20,6 | 27,0 | 51,2 | 76,4 | 67,0 | 2,6 | 7,4  |
| 10 | 2 | 11/7/2016  | 40 | 2,5 | 82   | 9,5  | 8,5  | 18   | 61,6 | 45,7 | 49,1 | 74,2 | 93,1 | 79,7 | 2,4 | 10,7 |
| 10 | 2 | 11/14/2016 | 30 | 2,5 | 68   | 23,2 | 8,9  | 32,1 | 54,0 | 31,7 | 40,0 | 58,7 | 79,2 | 74,1 | 2,9 | 10,0 |
| 10 | 2 | 11/21/2016 | 60 | 2,5 | 64,3 | 21,3 | 14,3 | 35,6 | 63,0 | 40,3 | 49,3 | 64,0 | 81,7 | 78,4 | 2,5 | 9,5  |
| 10 | 3 | 7/27/2016  | 45 | 2,5 | 79,4 | 13,4 | 7,2  | 20,6 | 56,9 | 38,5 | 45,4 | 67,6 | 84,7 | 79,8 | 2,6 | 10,1 |
| 10 | 3 | 8/17/2016  | 60 | 1   | 69,1 | 15,5 | 15,5 | 31   | 66,8 | 44,7 | 52,0 | 66,9 | 86,0 | 77,7 | 2,6 | 9,0  |
| 10 | 3 | 8/31/2016  | 30 | 1   | 72,0 | 26,6 | 1,4  | 28   | 26,6 | 9,2  | 15,6 | 34,7 | 59,1 | 58,7 | 2,2 | 9,1  |
| 10 | 3 | 9/12/2016  | 30 | 1   | 80,2 | 14,4 | 5,3  | 19,7 | 47,7 | 27,6 | 34,5 | 57,9 | 79,9 | 72,4 | 2,8 | 8,2  |
| 10 | 3 | 9/28/2016  | 40 | 1   | 41,3 | 45,7 | 13   | 58,7 | 38,1 | 19,5 | 26,1 | 51,3 | 74,7 | 68,6 | 2,6 | 8,4  |
| 10 | 3 | 10/10/2016 | 40 | 2   | 59,8 | 29,3 | 10,9 | 40,2 | 53,4 | 30,7 | 38,0 | 57,5 | 80,7 | 71,3 | 2,8 | 6,6  |
| 10 | 3 | 10/24/2016 | 35 | 1,5 | 80,2 | 15,3 | 4,5  | 19,8 | 51,3 | 24,9 | 35,0 | 48,6 | 71,2 | 68,3 | 2,4 | 9,0  |
| 10 | 3 | 11/7/2016  | 15 | 2   | 58,6 | 25,7 | 15,7 | 41,4 | 50,7 | 30,8 | 37,2 | 60,6 | 82,7 | 73,3 | 2,2 | 9,3  |
| 10 | 3 | 11/14/2016 | 20 | 1   | 85,2 | 12,4 | 2,3  | 14,7 | 35,7 | 15,5 | 22,0 | 43,4 | 70,3 | 61,7 | 1,6 | 7,1  |
| 10 | 3 | 11/21/2016 | 45 | 2,5 | 83,7 | 14   | 2,3  | 16,3 | 41,5 | 16,5 | 25,8 | 39,8 | 63,9 | 62,2 | 1,5 | 5,0  |
| 11 | 1 | 6/20/2016  | 80 | 3   | 9,3  | 42,9 | 47,8 | 90,7 | 70,7 | 44,9 | 54,2 | 63,5 | 82,9 | 76,6 | 3,0 | 9,3  |
| 11 | 1 | 6/27/2016  | 60 | 2,5 | 28,2 | 44,2 | 27,6 | 71,8 | 54,4 | 32,3 | 39,4 | 59,4 | 82,0 | 72,4 | 2,7 | 9,3  |
| 11 | 1 | 7/4/2016   | 90 | 4   | 41,9 | 47,5 | 10,6 | 58,1 | 39,4 | 17,1 | 24,2 | 43,3 | 70,6 | 61,4 | 3,0 | 10,0 |
| 11 | 1 | 7/13/2016  | 85 | 2,5 | 16,1 | 35,2 | 48,7 | 83,9 | 83,8 | 47,7 | 62,6 | 56,9 | 76,1 | 74,7 | 3,3 | 8,2  |

|    |   |            |    |     |      |      |      |      |      |      |      |      |      |      |     |      |
|----|---|------------|----|-----|------|------|------|------|------|------|------|------|------|------|-----|------|
| 11 | 1 | 7/18/2016  | 80 | 2   | 78,9 | 20,4 | 0,7  | 21,1 | 28,3 | 11,5 | 17,1 | 40,7 | 67,3 | 60,5 | 2,8 | 10,0 |
| 11 | 1 | 8/10/2016  | 85 | 3   | 13,6 | 53,4 | 33   | 86,4 | 65,8 | 32,2 | 45,6 | 48,9 | 70,7 | 69,2 | 3,1 | 8,0  |
| 11 | 1 | 9/7/2016   | 60 | 2   | 14,2 | 33,5 | 52,3 | 85,8 | 76,7 | 45,4 | 57,4 | 59,1 | 79,0 | 74,8 | 3,0 | 8,6  |
| 11 | 1 | 9/19/2016  | 85 | 2,5 | 34,5 | 60,5 | 5    | 65,5 | 34,6 | 12,9 | 21,3 | 37,2 | 60,3 | 61,6 | 3,1 | 7,8  |
| 11 | 1 | 9/21/2016  | 50 | 2   | 40,7 | 47,4 | 11,9 | 59,3 | 36,0 | 18,0 | 24,3 | 50,2 | 74,1 | 67,7 | 2,6 | 9,9  |
| 11 | 1 | 10/3/2016  | 70 | 2,5 | 31,6 | 50,2 | 18,2 | 68,4 | 47,1 | 23,3 | 32,3 | 49,5 | 72,3 | 68,5 | 3,1 | 8,3  |
| 11 | 1 | 10/17/2016 | 85 | 2   | 35,8 | 38,9 | 25,3 | 64,2 | 54,9 | 32,3 | 40,3 | 58,9 | 80,3 | 73,4 | 2,9 | 9,9  |
| 11 | 1 | 10/26/2016 | 80 | 2   | 24   | 54,1 | 22   | 76,1 | 50,6 | 23,4 | 34,3 | 46,3 | 68,3 | 67,8 | 2,9 | 7,6  |
| 11 | 1 | 11/7/2016  | 85 | 3   | 18,3 | 43,2 | 38,5 | 81,7 | 71,0 | 40,6 | 52,3 | 57,2 | 77,6 | 73,7 | 3,2 | 8,9  |
| 11 | 2 | 6/20/2016  | 65 | 1,5 | 80,4 | 18,2 | 1,4  | 19,6 | 23,7 | 9,8  | 14,3 | 41,5 | 68,7 | 60,4 | 2,4 | 9,5  |
| 11 | 2 | 6/27/2016  | 50 | 1,5 | 69,4 | 26,9 | 3,7  | 30,6 | 28,2 | 12,3 | 17,9 | 43,6 | 68,8 | 63,4 | 2,3 | 7,1  |
| 11 | 2 | 7/4/2016   | 60 | 1,5 | 79,4 | 18,8 | 1,7  | 20,5 | 27,8 | 10,8 | 17,0 | 38,8 | 63,7 | 60,9 | 2,7 | 9,1  |
| 11 | 2 | 7/13/2016  | 85 | 2,5 | 43,5 | 37   | 19,6 | 56,6 | 58,6 | 33,9 | 44,0 | 57,8 | 77,0 | 75,1 | 2,8 | 9,0  |
| 11 | 2 | 7/18/2016  | 65 | 1   | 60   | 38,3 | 1,8  | 40,1 | 31,6 | 8,6  | 16,9 | 27,1 | 50,9 | 53,3 | 2,8 | 9,5  |
| 11 | 2 | 8/10/2016  | 60 | 2   | 39,6 | 46,1 | 14,2 | 60,3 | 48,8 | 20,8 | 31,0 | 42,7 | 67,3 | 63,5 | 3,0 | 8,6  |
| 11 | 2 | 9/7/2016   | 90 | 2   | 38,4 | 52,1 | 9,5  | 61,6 | 40,7 | 15,0 | 24,2 | 36,8 | 61,8 | 59,5 | 3,2 | 7,8  |
| 11 | 2 | 9/19/2016  | 80 | 2   | 28,7 | 50,3 | 21   | 71,3 | 51,9 | 26,1 | 36,5 | 50,2 | 71,4 | 70,4 | 3,0 | 8,5  |
| 11 | 2 | 9/21/2016  | 75 | 1,5 | 41,7 | 50,6 | 7,6  | 58,2 | 39,2 | 14,9 | 23,8 | 38,0 | 62,6 | 60,7 | 2,8 | 8,2  |
| 11 | 2 | 10/3/2016  | 70 | 3   | 61,9 | 23,4 | 14,7 | 38,1 | 54,3 | 36,9 | 42,5 | 68,0 | 86,8 | 78,3 | 2,8 | 8,0  |
| 11 | 2 | 10/17/2016 | 20 | 1   | 84,1 | 14,4 | 1,4  | 15,8 | 31,2 | 11,5 | 17,6 | 36,8 | 65,3 | 56,3 | 1,5 | 5,5  |
| 11 | 2 | 10/26/2016 | 50 | 1,5 | 32,3 | 54,3 | 13,4 | 67,7 | 46,5 | 19,1 | 30,6 | 41,0 | 62,3 | 65,9 | 3,1 | 7,1  |
| 11 | 2 | 11/7/2016  | 35 | 1   | 83   | 12,6 | 4,3  | 16,9 | 55,1 | 32,7 | 41,2 | 59,4 | 79,4 | 74,8 | 2,7 | 9,7  |
| 11 | 3 | 7/13/2016  | 45 | 1   | 44   | 50,4 | 5,5  | 55,9 | 32,9 | 12,7 | 20,1 | 38,5 | 62,8 | 61,2 | 2,9 | 8,1  |
| 11 | 3 | 7/18/2016  | 40 | 2   | 76,1 | 18,9 | 5    | 23,9 | 38,4 | 20,4 | 26,6 | 52,9 | 76,4 | 69,3 | 1,9 | 6,7  |
| 11 | 3 | 8/10/2016  | 35 | 1   | 62,3 | 33,9 | 3,8  | 37,7 | 33,1 | 12,2 | 20,5 | 37,0 | 59,9 | 61,8 | 2,4 | 7,8  |
| 11 | 3 | 9/7/2016   | 40 | 2   | 58,3 | 32,7 | 9,1  | 41,8 | 35,4 | 17,6 | 24,0 | 49,8 | 73,3 | 67,9 | 2,7 | 8,3  |
| 11 | 3 | 9/19/2016  | 60 | 2   | 42,1 | 46,8 | 11,1 | 57,9 | 41,1 | 17,4 | 27,0 | 42,4 | 64,6 | 65,6 | 2,9 | 7,8  |
| 11 | 3 | 9/21/2016  | 60 | 2,5 | 57,8 | 39,3 | 2,9  | 42,2 | 26,9 | 10,1 | 16,6 | 37,5 | 60,8 | 61,6 | 2,9 | 8,4  |
| 11 | 3 | 10/3/2016  | 40 | 1   | 68,6 | 22,4 | 9,0  | 31,4 | 56,1 | 32,8 | 41,9 | 58,4 | 78,3 | 74,6 | 2,7 | 8,7  |
| 11 | 3 | 10/17/2016 | 40 | 2,5 | 76,1 | 19,3 | 4,6  | 23,9 | 38,6 | 18,3 | 25,3 | 47,5 | 72,4 | 65,6 | 2,1 | 7,4  |
| 11 | 3 | 10/26/2016 | 35 | 2   | 82,0 | 14,7 | 3,4  | 18,1 | 49,9 | 34,1 | 40,5 | 68,4 | 84,3 | 81,1 | 2,1 | 7,1  |
| 11 | 3 | 11/7/2016  | 35 | 2   | 88,6 | 10,0 | 1,4  | 11,4 | 43,3 | 23,8 | 30,0 | 54,9 | 79,2 | 69,4 | 1,4 | 6,1  |
| 12 | 1 | 6/20/2016  | 70 | 3   | 29,9 | 53,5 | 16,6 | 70,1 | 48,0 | 22,8 | 32,7 | 47,5 | 69,7 | 68,0 | 2,9 | 8,5  |

|    |   |            |    |     |      |      |      |      |      |      |      |      |      |      |     |      |
|----|---|------------|----|-----|------|------|------|------|------|------|------|------|------|------|-----|------|
| 12 | 1 | 6/27/2016  | 40 | 2   | 57,9 | 39,6 | 2,6  | 42,2 | 26,5 | 12,3 | 17,2 | 46,7 | 71,8 | 64,9 | 2,7 | 10,0 |
| 12 | 1 | 7/4/2016   | 45 | 2   | 69   | 29   | 2    | 31   | 27,3 | 14,4 | 19,5 | 52,9 | 74,1 | 71,4 | 2,2 | 11,9 |
| 12 | 1 | 7/13/2016  | 75 | 2,5 | 38,5 | 22,1 | 39,4 | 61,5 | 76,8 | 49,8 | 58,1 | 64,9 | 85,8 | 75,7 | 3,4 | 9,6  |
| 12 | 1 | 7/27/2016  | 80 | 2,5 | 17,9 | 47,2 | 34,9 | 82,1 | 85,0 | 38,4 | 56,2 | 45,2 | 68,4 | 66,2 | 3,5 | 8,6  |
| 12 | 1 | 8/17/2016  | 80 | 2   | 27,8 | 46,7 | 25,5 | 72,2 | 50,7 | 27,2 | 35,8 | 53,5 | 75,8 | 70,7 | 2,9 | 8,7  |
| 12 | 1 | 8/31/2016  | 85 | 3,5 | 26,7 | 18,7 | 54,6 | 73,3 | 95,4 | 71,9 | 80,6 | 75,4 | 89,3 | 84,5 | 2,9 | 9,7  |
| 12 | 1 | 9/12/2016  | 70 | 1,5 | 35,9 | 55,3 | 8,8  | 64,1 | 36,8 | 14,8 | 23,2 | 40,2 | 63,8 | 63,0 | 3,0 | 8,1  |
| 12 | 1 | 9/28/2016  | 70 | 2,5 | 30,8 | 50,9 | 18,4 | 69,3 | 49,8 | 23,5 | 32,9 | 47,2 | 71,5 | 66,1 | 3,1 | 8,2  |
| 12 | 1 | 10/10/2016 | 70 | 2,5 | 44,5 | 31,1 | 24,4 | 55,5 | 61,0 | 40,6 | 47,9 | 66,6 | 84,8 | 78,5 | 3,2 | 9,2  |
| 12 | 1 | 10/24/2016 | 80 | 2   | 31   | 34,8 | 34,1 | 68,9 | 66,6 | 35,0 | 45,0 | 52,5 | 77,8 | 67,5 | 3,1 | 8,9  |
| 12 | 1 | 11/7/2016  | 90 | 3   | 12,2 | 32,4 | 55,4 | 87,8 | 85,3 | 59,4 | 69,3 | 69,7 | 85,7 | 81,3 | 3,1 | 10,0 |
| 12 | 1 | 11/14/2016 | 75 | 2   | 15,5 | 48,2 | 36,3 | 84,5 | 71,7 | 35,5 | 46,7 | 49,5 | 76,1 | 65,1 | 3,2 | 10,3 |
| 12 | 1 | 11/21/2016 | 80 | 3,5 | 33,6 | 36   | 30,4 | 66,4 | 62,6 | 38,8 | 50,2 | 62,0 | 77,3 | 80,2 | 2,7 | 7,9  |
| 12 | 2 | 6/20/2016  |    |     | 69,9 | 25,1 | 5    | 30,1 | 33,5 | 15,6 | 20,8 | 46,4 | 74,9 | 62,0 | 2,9 | 9,7  |
| 12 | 2 | 6/27/2016  | 80 | 2   | 35,9 | 59,3 | 4,8  | 64,1 | 37,6 | 13,0 | 22,3 | 34,6 | 58,2 | 59,4 | 3,3 | 6,7  |
| 12 | 2 | 7/4/2016   | 60 | 1   | 79,5 | 19,2 | 1,3  | 20,5 | 28,6 | 10,1 | 16,5 | 35,2 | 61,0 | 57,7 | 2,9 | 8,2  |
| 12 | 2 | 7/13/2016  | 85 | 2,5 | 29,4 | 62,8 | 7,8  | 70,6 | 43,1 | 13,8 | 24,2 | 32,0 | 57,0 | 56,3 | 3,2 | 7,1  |
| 12 | 2 | 7/27/2016  | 65 | 2,5 |      |      |      |      |      |      |      |      |      |      |     |      |
| 12 | 2 | 8/17/2016  | 40 | 1   | 83,3 | 16,7 | 0    | 16,7 | 25,4 | 6,2  | 13,9 | 24,4 | 44,6 | 54,8 | 0,0 | 0,0  |
| 12 | 2 | 8/31/2016  | 75 | 1,5 | 43,2 | 49,8 | 7    | 56,8 | 44,5 | 14,2 | 24,9 | 32,0 | 57,1 | 56,0 | 3,2 | 7,5  |
| 12 | 2 | 9/12/2016  | 40 | 1   |      |      |      |      |      |      |      |      |      |      |     |      |
| 12 | 2 | 9/28/2016  | 50 | 1,5 |      |      |      |      |      |      |      |      |      |      |     |      |
| 12 | 2 | 10/10/2016 | 65 | 2   | 89,7 | 8,1  | 2,2  | 10,3 | 41,2 | 18,9 | 25,5 | 46,0 | 74,2 | 62,0 | 1,5 | 4,1  |
| 12 | 2 | 10/24/2016 | 35 | 1   | 82,5 | 12,9 | 4,6  | 17,5 | 48,8 | 23,0 | 30,1 | 47,2 | 76,4 | 61,8 | 3,3 | 8,7  |
| 12 | 2 | 11/7/2016  | 45 | 1,5 | 67,7 | 19,2 | 13,2 | 32,4 | 53,2 | 36,6 | 42,3 | 68,8 | 86,5 | 79,5 | 2,4 | 9,4  |
| 12 | 2 | 11/14/2016 | 40 | 2   | 71   | 19,9 | 9    | 28,9 | 50,5 | 35,3 | 41,8 | 69,9 | 84,3 | 82,9 | 2,2 | 9,6  |
| 12 | 2 | 11/21/2016 | 40 | 2   | 30   | 42,1 | 27,9 | 70   | 60,9 | 35,7 | 46,9 | 58,7 | 76,2 | 77,1 | 2,8 | 7,6  |
| 12 | 3 | 7/27/2016  | 60 | 1,5 | 79,5 | 14,4 | 6,1  | 20,5 | 48,9 | 27,1 | 34,0 | 55,3 | 79,6 | 69,5 | 3,0 | 7,9  |
| 12 | 3 | 8/17/2016  | 30 | 1   | 42,6 | 50,0 | 7,5  | 57,5 | 35,5 | 14,7 | 23,0 | 41,5 | 64,0 | 64,9 | 2,7 | 7,3  |
| 12 | 3 | 8/31/2016  | 30 | 1   | 82,7 | 14,7 | 2,6  | 17,3 | 37,7 | 16,4 | 24,3 | 43,5 | 67,5 | 64,5 | 2,7 | 9,7  |
| 12 | 3 | 9/12/2016  | 60 | 1,5 |      |      |      |      |      |      |      |      |      |      |     |      |
| 12 | 3 | 9/28/2016  | 45 | 1,5 | 68,4 | 25,1 | 6,5  | 31,6 | 36,5 | 18,6 | 24,9 | 50,9 | 74,7 | 68,1 | 2,6 | 9,4  |
| 12 | 3 | 10/10/2016 | 60 | 2,5 | 70,7 | 18,9 | 10,4 | 29,3 | 66,3 | 43,0 | 52,7 | 64,8 | 81,5 | 79,5 | 3,2 | 9,1  |

|    |   |            |    |     |      |      |     |      |      |      |      |      |      |      |     |     |
|----|---|------------|----|-----|------|------|-----|------|------|------|------|------|------|------|-----|-----|
| 12 | 3 | 10/24/2016 | 45 | 2   | 74,7 | 20,9 | 4,4 | 25,3 | 41,1 | 21,2 | 26,7 | 51,6 | 79,2 | 65,1 | 2,2 | 6,4 |
| 12 | 3 | 11/7/2016  | 10 | 1   | 83,6 | 9,9  | 6,5 | 16,4 | 76,2 | 55,2 | 62,0 | 72,4 | 89,1 | 81,3 | 2,1 | 9,6 |
| 12 | 3 | 11/14/2010 | 40 | 2,5 | 89,6 | 8,4  | 2,0 | 10,4 | 30,9 | 11,3 | 15,7 | 36,7 | 72,1 | 50,8 | 1,2 | 4,4 |
| 12 | 3 | 11/21/2016 | 35 | 2   | 86,6 | 9,5  | 3,9 | 13,4 | 61,3 | 39,9 | 47,2 | 65,1 | 84,5 | 77,0 | 2,0 | 8,0 |
